# 1 Chlorine redox chemistry is not rare in biology

2

3 Tyler P. Barnum<sup>1</sup> and John D. Coates<sup>1\*</sup>

4 <sup>1</sup> Department of Plant and Microbial Biology, University of California, Berkeley, CA 94720, USA

5 \* Corresponding author: [jdcoates@berkeley.edu](mailto:jdcoates@berkeley.edu)

6

## 7 Abstract

8

9 Chlorine is abundant in cells and biomolecules, yet the biology of chlorine oxidation and  
10 reduction is poorly understood. Some bacteria encode the enzyme chlorite dismutase  
11 (Cld), which detoxifies chlorite ( $\text{ClO}_2^-$ ) by converting it to chloride ( $\text{Cl}^-$ ) and molecular  
12 oxygen ( $\text{O}_2$ ). Cld is highly specific for chlorite and aside from low hydrogen peroxide  
13 activity has no known alternative substrate. Here, we reasoned that because chlorite is  
14 an intermediate oxidation state of chlorine, Cld can be used as a biomarker for oxidized  
15 chlorine species in microorganisms and microbial habitats. Cld was abundant in  
16 metagenomes from soils and freshwater to water treatment systems. About 5% of  
17 bacterial and archaeal genera contain an organism encoding Cld in its genome, and  
18 within some genera Cld is nearly conserved. Cld has been subjected to extensive  
19 horizontal gene transfer, suggesting selection by chlorite is episodic yet strong. Cld was  
20 also used as a biomarker to predict genes related to chlorine redox chemistry. Genes  
21 found to have a genetic association with Cld include known genes for responding to  
22 reactive chlorine species and uncharacterized genes for transporters, regulatory  
23 elements, and putative oxidoreductases that present targets for future research. Cld  
24 was repeatedly co-located in genomes with genes for enzymes that can inadvertently  
25 reduce perchlorate ( $\text{ClO}_4^-$ ) or chlorate ( $\text{ClO}_3^-$ ), confirming that in nature (per)chlorate  
26 reduction does not only occur in specialized anaerobic respiratory metabolisms. The  
27 presence of Cld in genomes of obligate aerobes without such enzymes suggested that  
28 chlorite, like hypochlorous acid ( $\text{HOCl}$ ), might be formed by oxidative processes within  
29 natural habitats. In summary, the comparative genomics of Cld has provided an atlas for  
30 a deeper understanding of chlorine oxidation and reduction reactions that are an  
31 underrecognized feature of biology.

32

## 33 Introduction

34

35 The physical and chemical forms of chlorine are controlled by a biogeochemical cycle <sup>1</sup>.  
36 Chloride (Cl<sup>-</sup>) is the predominant species, and its distribution is largely controlled by  
37 physical processes and cellular transport. Organic chlorine species – a diverse range of  
38 compounds in which chlorine is a chloro group (-Cl) – are produced and consumed by  
39 organisms for chemical defense, signaling, energy, and growth <sup>1-3</sup>. Inorganic chlorine  
40 species – including the chlorine oxyanions hypochlorite (ClO<sup>-</sup>) (and its conjugate acid  
41 hypochlorous acid, HOCl), chlorite (ClO<sub>2</sub><sup>-</sup>), chlorate (ClO<sub>3</sub><sup>-</sup>), and perchlorate (ClO<sub>4</sub><sup>-</sup>) – are  
42 known to be produced by reduction and oxidation of chlorine <sup>3-8</sup>. However, a substantial  
43 number of questions remain about the extent to these redox reactions participate in  
44 biology.

45

46 The biology of oxidized chlorine species relates to their high potential to oxidize other  
47 molecules. Perchlorate is stable in aqueous solution, but chlorate, chlorite, and  
48 hypochlorous acid can be chemically reduced, with each subsequent molecule being  
49 more reactive. Reactive chlorine species (RCS) damage cells through oxidative stress <sup>7,9</sup>.  
50 For example, hypochlorous acid causes protein misfolding and sulfur starvation by  
51 rapidly oxidizing sulfur in the amino acids methionine and cysteine <sup>7,9</sup>. Microorganisms  
52 from many habitats likely encounter hypochlorous acid <sup>4,6,7</sup>, atmospherically deposited  
53 perchlorate and chlorate <sup>8</sup>, and other, anthropogenic reactive chlorine species <sup>10,11</sup>.  
54 More biological roles for oxidized chlorine species have been described, including as  
55 sources of energy for microorganisms or as chemical weapons <sup>4,7,12</sup>, but the biology of  
56 oxidized chlorines remains incompletely understood. An inventory of habitats in which  
57 these chemicals affect organisms, the organisms they affect, and the genes in those  
58 organisms potentially involved in chlorine biology would do much to advance our  
59 understanding.

60

61 The source of oxidized chlorine species within biological habitats depends on the  
62 oxidation state of the molecule. Hypochlorous acid can be produced within microbial  
63 habitats and cells from chemical or biochemical oxidation of chloride by enzymes like  
64 chloroperoxidase <sup>6,9,13,14</sup> <sup>3</sup>. No biological oxidation of chlorine to chlorite, however, has  
65 been observed, likely due to the high reduction potential of the redox half-reactions  
66 involved (>1 V) <sup>8</sup>. While (photo)chemical oxidation of aqueous hypochlorous acid to  
67 chlorate and perchlorate has been observed experimentally <sup>15</sup>, in nature production of  
68 perchlorate and chlorate is thought to occur predominantly in the atmosphere <sup>16,17</sup> <sup>8</sup>.  
69 The diversity of chlorine-oxidizing chemical reactions that occur within biological  
70 habitats would be greatly clarified by evidence of which different compounds  
71 microorganisms encounter.

72

73 The degradation of oxidized chlorine species, aside from hypochlorous acid, is thought  
74 to occur predominantly through dissimilatory (per)chlorate reduction, a specialized  
75 anaerobic respiratory pathway wherein high affinity perchlorate reductases (Pcr) or  
76 chlorate reductases (Clr) reduce perchlorate or chlorate to provide energy in anoxic

77 habitats<sup>8,18,19</sup>. Reduction may instead occur through co-metabolism: due to the  
78 structural and chemical similarity between oxyanions like nitrate and chlorate and  
79 perchlorate, enzymes such as nitrate reductase can reduce perchlorate or chlorate<sup>20-24</sup>.  
80 This inadvertent reduction of perchlorate or chlorate produces chlorite and damages  
81 cells unless chlorite is degraded<sup>25</sup>. An unanswered question is if co-metabolic  
82 (per)chlorate reduction occurs at a meaningful extent at the low concentrations of  
83 perchlorate and chlorate found in nature. If so, many more organisms would contribute  
84 to perchlorate and chlorate reduction than presently understood.

85  
86 Thus, significant gaps remain in our understanding chlorine reduction and oxidation in  
87 biology. A promising approach to answer these questions is to identify and use a  
88 biomarker for oxidized chlorine molecules. Chlorite dismutase (Cld) is a heme-containing  
89 enzyme that catalyzes a chlorite:oxygen lyase reaction wherein a single molecule of  
90 chlorite is cleaved into chloride and molecular oxygen, which detoxifies chlorite and  
91 yields oxygen<sup>26-28</sup>. First identified as necessary enzyme in canonical dissimilatory  
92 (per)chlorate reducing bacteria<sup>29,30</sup>, Cld has since been found in bacteria not known to  
93 produce chlorite as part of their metabolism<sup>31</sup>. Subsequent investigations have defined  
94 the amino acids required for Cld activity<sup>32</sup> and found that aside from low hydrogen  
95 peroxidase activity, Cld has no activity towards other compounds, including nitrite, nitric  
96 oxide, hydroxylamine, and thiocyanate<sup>31,33</sup>. These properties make the gene *cld* a  
97 useful, specific biomarker for chlorite. Because chlorite is an intermediate oxidation  
98 state of chlorine, organisms encoding Cld in their genomes have likely experienced not  
99 only chlorite but also more-oxidized chlorine species that can be reduced to chlorite and  
100 more-reduced chlorine oxyanion species to which chlorite is reduced.

101  
102 Here, we use *cld* as a biomarker for chlorite in microbial genomes to expand what is  
103 known about the biology of chlorine oxyanions and redox chemistry. This comparative  
104 genomics approach adopts only two assumptions: that organisms encoding Cld  
105 experienced chlorite, and that genetic proximity to *cld* means a gene's product is more  
106 likely to function in producing chlorite or responding to its presence. By identifying *cld*  
107 and its neighboring genes in thousands of genomes and metagenomes, we were able to  
108 describe the distribution of Cld across taxa and environments, expand the evolutionary  
109 history of Cld, and predict genes that are functionally related to Cld activity, including  
110 biology involving other oxidized chlorine species. These results provide an extensive  
111 genomic catalogue for further research in multiple aspects of the biology of chlorine  
112 oxidation and reduction.

113

## 114 **Results and Discussion**

115

### 116 *Distribution of Cld*

117

118 Cld proteins belong to the protein family Pfam 06778, which is part of the CDE  
119 superfamily<sup>34</sup>. Non-Cld proteins in Pfam 06778, from which Cld evolved<sup>35</sup>, are mostly  
120 iron-coproporphyrin oxidative decarboxylases (HemQ) that are required for heme

121 biosynthesis in monoderm bacteria <sup>36</sup>. The use of chlorite dismutase (Cld) as a  
122 biomarker requires an accurate definition of proteins with Cld activity, as non-Cld  
123 proteins are often incorrectly annotated as Cld or Cld-like proteins in public databases.  
124 Here, Cld was defined as proteins in Pfam O6778 that contain the key residues required  
125 for Cld activity <sup>26,32</sup>. Cld proteins formed a monophyletic clade (Figure 1A), confirming  
126 previous analyses with smaller datasets <sup>25,35,37</sup>. Cld proteins were primarily found in  
127 diderm phyla (Figure 1A) and were sparsely distributed across the tree of life (Figure  
128 1B). All further investigations of Cld refer only to such proteins, which are further  
129 divided into two major clades, lineage 1 and lineage 2 Cld <sup>38</sup>.

130

131 Profile-HMMs for both lineages of Cld were constructed and used to identify 2411 Cld  
132 proteins encoded in 2297 genomes/metagenome-assembled genomes and 6469 Cld in  
133 1575 metagenomes (Figure 1C, Supplementary Data). Here, Cld was identified in 14  
134 phyla and 143 genera, including the bacterial phyla *Actinobacteria*, *Verrucomicrobia*,  
135 *Firmicutes*, *Chloroflexi*, and *Spirochaetes* in which Cld has not previously been reported  
136 (Supplementary Data). For the first time, Cld was identified in the *Archaea* and *Eukarya*.  
137 The low percent identity to bacterial Cld sequences and the similarity of neighboring  
138 genes to non-bacterial genes corroborated their assignment to these taxa. The  
139 eukaryote with Cld was the unicellular green alga *Monoraphidium neglectum* <sup>39</sup>. Cld was  
140 previously reported in a different eukaryote, the poplar tree (*Populus*) <sup>38</sup>, but this was  
141 later determined to be contamination by bacterial genomic DNA and removed (personal  
142 communication, Joint Genome Institute).

143

144 Overall, Cld was observed in approximately 1% of genomes, 5% of genera and 15% of  
145 phyla in the NCBI taxonomy among the prokaryotes sampled. Genomes from the phyla  
146 *Nitrospirae*, *Planctomycetes*, and *Nitrospinae* are most likely to contain Cld, followed by  
147 *Proteobacteria* and *Cyanobacteria* (Figure 1D). The frequency of Cld in *Nitrospirae* and  
148 *Nitrospinae* may be underestimated due to the large number of incomplete  
149 metagenome-derived genomes in these phyla. At the genus level, typically only a  
150 fraction of genomes had Cld, although Cld could be highly conserved within a genus  
151 (Figure 1E). Many of these genera belong to specific biological groups, like symbiotic  
152 nitrogen-fixing bacteria or nitrite-oxidizing bacteria, but it is unknown whether Cld is  
153 related to these biological functions. The extent to which Cld can be found outside of  
154 dissimilatory perchlorate- and chlorate-reducing bacteria, and potentially associated  
155 with other specific microbial lifestyles, far exceeds that described previously.

156

157 The widespread nature of Cld was further supported by its distribution across a dataset  
158 of 6961 IMG/M metagenomes encoding 10.8 billion genes. *cid* were a very low  
159 proportion of genes in host-associated systems and a greater proportion in freshwater  
160 and soil systems (Figure 1F). Comparing metagenomes with greater than 10 million  
161 genes with this metric indicated that *cid* was most enriched in environments such as  
162 oligotrophic rocks, sediment, and ice followed by oxic wastewater, surface freshwater,  
163 and dryland soils. Curiously, within aquatic environments, *cid* appears least frequently  
164 where chlorine is most concentrated: estuary, ocean, and hypersaline waters. The



165 shared features of environments where *cld* is the highest proportion of coding genes is  
166 that they are predominantly oxic, and many are exposed to high amounts of sunlight  
167 <sup>40,41</sup>. The broad distribution of the *cld* gene in genomes and metagenomes shows that  
168 chlorite is experienced by many organisms in a variety of environments. Instead of being  
169 a tool of specialized anaerobic metabolisms found in anoxic habitats, Cld is encoded by  
170 various organisms from both oxic and anoxic habitats.

171

### 172 *Evolution of Cld*

173

174 The evolutionary history of Cld may help clarify its biological role. The phylogeny of Cld  
175 could be more thoroughly defined using this expanded set of genomic and metagenomic  
176 proteins. A phylogenetic tree of 8924 Cld was constructed, grouped into 60 clades with  
177 a median clade size of 11 proteins and a maximum clade size of 2936 proteins, and  
178 annotated with data about the Cld protein (Figure 2). Only about half of the sequence  
179 diversity of Cld is present in cultured organisms (Figure 2A). There is no indication in  
180 these data that Cld proteins have lost chlorite:O<sub>2</sub> lyase activity: many of the largest  
181 clades include Cld proteins with biochemically verified activity, and the key residues for  
182 chlorite:O<sub>2</sub> lyase activity were conserved in all clades except the under-sampled clades  
183 10 (n=2) and 32 (n=1) and clade 38 (n=21) (Figure 2B).

184

185 These data do revise the previous understanding of Cld being composed of two lineages  
186 wherein lineage 1 Cld are larger, periplasmic proteins and lineage 2 Cld are smaller,  
187 cytoplasmic proteins <sup>26,42</sup>. First, tree topology showed two distinct, diverse, and strongly  
188 supported (>99% bootstraps) sublineages within lineage 2 Cld, which we term lineage 2a  
189 and 2b. The only cultivated organism with lineage 2b Cld is *Nitrospina gracilis* <sup>43</sup>. lineage  
190 2b proteins are an intermediate length of 229 amino acids, and considerable variation in  
191 protein size was observed within the shorter lineage 2a Cld (Figure 2C): 4% of Cld had  
192 larger (>20 aa) N- and C-terminal extensions that could either be artifacts of protein  
193 prediction or fusion proteins that augment the function of Cld <sup>44</sup>. Second, signal peptide  
194 prediction suggested that the more basal branching clades of group 1 Cld are not  
195 periplasmic, while two clades of lineage 2b Cld are periplasmic and a small number of  
196 Cld from various lineage 2a clades are periplasmic (Figure 2C). This indicates a general  
197 purpose of Cld for degradation of intracellular chlorite but periodic selection for the  
198 degradation of extracellular chlorite through the acquisition of peptide signals for  
199 export, in any lineage.

200

201 Horizontal gene transfer of Cld across evolutionary time is evident from its taxonomic  
202 distribution. A single taxonomic group can have organisms with Cld from different  
203 clades (Figure 2C). A single Cld clade can be found in taxonomic groups spanning phyla  
204 or even domains of life. Cld has even been subject to recent transfer between genera:  
205 multiple Cld clades consisted of Cld from different genera (Figure 2D). Alone, this metric  
206 reflects the combined signal of vertical and horizontal inheritance, but a detailed view  
207 shows that horizontal inheritance is a large component. For example, within clade 4,

208 there are two instances where Cld from (per)chlorate-reducing proteobacteria appeared  
209 to have been acquired by nitrite-oxidizing *Nitrotoga* (Supplemental Figure 2)<sup>45</sup>.  
210 Representing the most recent horizontal gene transfer: genomes from different genera  
211 possessed identical Cld proteins (Figure 2D). In one case the same Cld protein  
212 (WP\_011514928.1) was found in genomes from 18 genera and spanning  
213 *Alphaproteobacteria*, *Gammaproteobacteria*, *Betaproteobacteria*. One remarkable  
214 recent horizontal gene transfer is the acquisition of periplasmic Cld by *Nitrosomonas*  
215 *mobilis* Ms1, which was isolated from a wastewater treatment plant that used chlorine-  
216 based disinfectants (personal communication, Hirotsugu Fujitani)<sup>46,47</sup>. That Cld has  
217 never been observed in ammonia-oxidizing microorganisms prior to this is evidence of  
218 how the evolution of Cld is now also being shaped by anthropogenic sources of chlorite.  
219

220 The scope of horizontal gene transfer and the degree to which it has occurred suggests  
221 occasional yet strong selection for the ability to degrade chlorite. The apparent benefit  
222 of Cld and ease of its horizontal gene transfer can be reconciled by its rare conservation  
223 within phylogenetic groups (Figure 1) by invoking a selective pressure for loss of Cld,  
224 possibly related to the heme requirement for this enzyme.  
225

#### 226 *Comparative Genomics of Cld*

227

228 Diverse organisms have experienced enough chlorite to select for the *cld* gene (Figures  
229 1-2). Because genes located near each other in and across genomes are more likely to  
230 be functionally related<sup>48,49</sup>, co-location of genes with *cld* across genomes provides an  
231 opportunity to identify other genes likely to be involved in biological processes involving  
232 chlorite. We refer the set of genes within 10 genes upstream and downstream of *cld* as  
233 a “genomic neighborhood.” 8,751 genomic neighborhoods contained 61,215 proteins  
234 that were clustered into 11,081 protein subfamilies. Subfamilies with a low “clustering  
235 coefficient” (Methods, Figure 3A) are found in many different types of genomic  
236 neighborhoods with Cld and, therefore, are more likely to have a function related to  
237 chlorine redox biology, rather than be co-located by chance.  
238

239 Only a small fraction of protein subfamilies in Cld genomic neighborhoods showed a  
240 genetic correlation with Cld (Figure 3B). Of most interest are proteins with the lowest  
241 clustering coefficients (Table 1), which have the strongest genetic association to Cld.  
242 Among these proteins were proteins with functions already known to be connected to  
243 Cld, such as (per)chlorate reductases, oxidative stress response, genetic mobility, and  
244 signaling<sup>50-52</sup>. Additionally, since this work began, an alkylhydroperoxidase AhpD-like  
245 protein (subfamily 84), identified here as having a low clustering coefficient (Table 1),  
246 was found to be the enzyme RcsA involved in hypochlorous acid degradation in  
247 *Pseudomonas aeruginosa*<sup>53</sup>. Therefore, this method identified true genetic associations  
248 between Cld and other protein subfamilies.  
249

250 Groups of highly similar genomic neighborhoods were defined by unsupervised  
251 clustering of neighborhoods with greater than 10 genes (Figures 3A). Neighborhood

252 groups were distinguished by their most abundant non-Cld protein subfamilies (Figure  
253 3C) and recapitulated major differences in Cld (e.g. group 1 vs. 2 Cld, presence or  
254 absence of Pcr/Nar-like reductases) (Figure 3C). In total, 20 distinct genomic contexts  
255 were produced by clustering, and more groups would likely result with the inclusion of  
256 more genomes and metagenomes. Emblematic of this functional diversity is that all  
257 known genomic islands and composite transposons for respiratory perchlorate and  
258 chlorate reduction – the only biological pathway Cld has been confirmed participating in  
259 naturally – were contained in one single neighborhood group (Clark et al 2013, Melynk  
260 and Coates 2015).

261

262 Clustering coefficients for protein subfamilies and grouping of neighborhoods allows  
263 exploration of relationships between protein families. Among the most interesting  
264 genetic associations to Cld were those of putative oxidoreductases with unknown  
265 function. Such oxidoreductases accounted for many of the subfamilies with the lowest  
266 clustering coefficients (Table 1): cupin domain-containing protein (subfamily 3),  
267 NADPH:quinone reductase-like Zn-dependent oxidoreductase (subfamily 85), and SDR  
268 family NAD(P)-dependent oxidoreductase (subfamily 8). Neighborhood-group 2  
269 contained the SDR family NAD(P)-dependent oxidoreductase<sup>54</sup> as well as reactive  
270 chlorine-sensing regulatory elements that also had low clustering coefficients  
271 (subfamilies 37 and 62), further implicating a role this subfamily in reactive chlorine  
272 stress response. Curiously, fitness data for a protein in *Sphingomonas koreensis* DSMZ  
273 15582 with 47% amino acid identity to a related SDR family NAD(P)-dependent  
274 oxidoreductase (subfamily 827, clustering coefficient 0.15) showed a deleterious effect  
275 when this protein was disrupted only in chlorite stress conditions or when glutamic acid  
276 was the carbon source<sup>55</sup>. The cupin domain protein was one of the most common  
277 subfamilies in the dataset, being found with Cld in 1487 genomes among 40 genera. In  
278 fact, encoded with transposases in neighborhood groups 12, 15, and 21, the cupin  
279 domain protein could be found in 90% of genomic neighborhoods with the most  
280 extreme form of horizontal gene transfer: encoding Cld proteins that are identical across  
281 different genera. While the cupin domain protein has been suspected to have a role in  
282 reactive chlorine species response in (per)chlorate reducing bacteria<sup>56</sup>, these data point  
283 to a far more common and important role in chlorine redox biology.

284

285 In addition to providing genes and loci for reverse genetics, these genetic associations  
286 are useful for further describing chlorine redox biology. Cld genomic neighborhoods  
287 were first searched for genes described as participating in the response to reactive  
288 chlorine species: methionine sulfoxide reductases, sulfur homeostasis proteins, protein  
289 chaperones, regulatory systems, and scavenging of reactive byproducts like peroxides,  
290 aldehydes, and glyoxals<sup>7,56,57</sup>. One or more of these genes could indeed be found in Cld  
291 neighborhood-groups (Supplemental Data), and Cld was routinely found with  
292 methionine sulfoxide reductase systems (Supplemental Figure 3). This confirms that  
293 organisms use these genes are not experimental artifacts but respond to reactive  
294 chlorine species in nature. Additionally, it provides more evidence that chlorite is

295 produced at a sufficient flux in the environment to contribute to oxidative damage in  
296 microorganisms.

297

298 The transport of chlorine oxyanions across the cellular membrane appeared to be a  
299 defining feature of two types of Cld genomic neighborhoods (Figure 3C). No specific  
300 transporters for chlorine oxyanions are known. Neighborhood group 11 contained by  
301 ABC transporter subunits, some of which are annotated as ATP-driven nitrate  
302 transporters. Such transporters could be involved in the transport of chlorate, a  
303 structural analogue of nitrate, an activity previously identified for nitrate transporters by  
304 genetic selection for chlorate resistance for example, see: <sup>58</sup>. Neighborhood group 17  
305 was distinguished by a formate-nitrite transporter (FNT) family protein, an MsrP protein  
306 involved periplasmic reactive chlorine stress response (see below), and cytoplasmic Cld.  
307 As with nitrate and chlorate, formate ( $\text{HCO}_2^-$ ) and nitrite ( $\text{NO}_2^-$ ) are structural analogues  
308 of chlorite ( $\text{ClO}_2^-$ ), and the potential for FNT family proteins to transport chlorite as well  
309 has been shown by the deleterious nature of FocA formate transporters and NirC nitrite  
310 transporters in chlorite stress conditions <sup>55</sup>. Curiously, the FNT-Cld-MsrP gene cluster  
311 belonged to metagenomic *Mycobacteria* found in seasonally low-oxygen lakes <sup>59,60</sup>. The  
312 combination of a chlorite-permeable transporter and cytoplasmic Cld might act to  
313 import extracellular chlorite to be converted to oxygen inside the cell. Microorganisms  
314 benefitting from the production of oxygen by Cld is a trait thus far observed only in  
315 (per)chlorate-reducing bacteria or engineered strains <sup>8,61</sup>.

316

317 Chlorination and dechlorination are only known to be related to hypochlorous acid, not  
318 higher oxidation states of chlorine like chlorite. Relatively low clustering coefficients  
319 with Cld for two protein subfamilies suggested otherwise: non-heme chloroperoxidase  
320 (subfamily 122), which chlorinates organic molecules by producing hypochlorous acid,  
321 and a putative subfamily of haloacid dehalogenases (subfamily 172), which removes  
322 chlorine from organic molecules. The relationship could be that chlorite produces and  
323 may be produced by hypochlorous acid, which generates stable chlorinated products  
324 like chlorotyrosine <sup>62</sup>, and microorganisms use dehalogenases to reverse that  
325 chlorination.

326

### 327 *Chlorite from Chlorine Reduction*

328

329 The involvement of the above biological functions in chlorine redox biology may be  
330 closely related to how chlorite is produced. The major known source of chlorite in  
331 biology is the enzymatic reduction of perchlorate and chlorate. To determine which  
332 biochemical pathways contribute to chlorine reduction, Cld genomic neighborhoods  
333 were searched for proteins in the DMSO reductase family of molybdopterin enzymes  
334 (Pfam 00384), which includes the respiratory perchlorate and chlorate reductases (Pcr,  
335 Clr) and the enzymes that might inadvertently/co-metabolically reduce those molecules  
336 while acting in other biochemical pathways <sup>20</sup>. If the enzyme reduces perchlorate or  
337 chlorate to chlorite in nature, Cld can provide a benefit by degrading chlorite, and the

338 selective pressure to co-express the reductase with would lead to their genetic co-  
339 location in some genomes (Figure 4A).

340

341 A total of 105 proteins in the DMSO reductase family were found in Cld genomic  
342 neighborhoods. Many genomic neighborhoods contained cytoplasmic Cld and enzymes  
343 with documented *in vitro* (per)chlorate reductase activity (Figure 4B-E): assimilatory  
344 nitrate reductases (NasA) of three phylotypes, a cytoplasmic dissimilatory nitrate  
345 reductase (NarG) from a *Cryobacterium* genome<sup>63</sup>, and a tetrathionate reductase (TtrA)  
346 from a *Diaphorobacter* genome<sup>64</sup>. The co-occurrence of Cld with formate  
347 dehydrogenase (FdhN) and an uncharacterized Fdh-like protein (YdeP) was unexpected  
348 but could be related somehow to the structural similarity of chlorite and formate. Cld  
349 was also found on soil metagenome contigs with uncharacterized enzymes most similar  
350 to periplasmic nitrite oxidoreductases (pNxr) of nitrite-oxidizing bacteria (*Nitrospira* and  
351 *Nitrotoga*), anammox bacteria, and other organisms<sup>45</sup>. This uncharacterized reductase  
352 can be found with either periplasmic or cytoplasmic Cld, so it is not likely to function in  
353 dissimilatory (per)chlorate reduction pathways, which are only known to occur in the  
354 periplasm<sup>12</sup>. These and other co-metabolic reductases were encoded near *cld* in  
355 metagenomes of dryland soil, surface waters, and oxic wastewater (Figure 4C). Co-  
356 metabolic reduction of perchlorate and chlorate has long been suspected based on  
357 laboratory evidence<sup>8</sup>. The genetic association of Cld with diverse enzymes with co-  
358 metabolic (per)chlorate reductase activity confirms that inadvertent reduction occurs in  
359 nature.

360

361 Most commonly, the reductases detected with Cld in metagenomes were not co-  
362 metabolic reductases but Pcr and the newly characterized group 3 Clr<sup>65</sup> (Figure 4E);  
363 other chlorate reductases were not detected. How this relates to the contribution of co-  
364 metabolic and metabolic pathways to perchlorate and chlorate reduction rates is  
365 unclear. These natural populations of dissimilatory (per)chlorate-reducing  
366 microorganisms – organisms that have had no experimental selection for the ability to  
367 respire perchlorate or chlorate – are closely related to a subset of previously identified  
368 strains and may have similar traits (Figure 4D). Curiously, the genome of one natural  
369 (per)chlorate-reducing strain, GWC2\_42\_11, assembled from an aquifer sediment  
370 metagenome<sup>66</sup>, encodes phylogenetically divergent copies of both Pcr and group 3 Clr  
371 (Figure 4C). Two genes for Cld from this organism are found in Cld clade 6, which share a  
372 more recent ancestor with nitrite-oxidizing *Nitrospira* (clade 5, clades 7-9) than  
373 perchlorate-reducing bacteria (clade 4) (Figure 2). As a member of the class  
374 *Deltaproteobacteria* (phylum GWC2-55-46 in GTDB taxonomy), GWC2\_42\_11 is the  
375 most evolutionary distinct (per)chlorate-reducing bacterium identified to date, and its  
376 equally divergent reductases and Cld might help in understanding the earliest forms of  
377 perchlorate and chlorate respiration.

378

379 That ancient form of dissimilatory (per)chlorate reduction may have resembled co-  
380 metabolic (per)chlorate reduction in an organism with Cld. Cld has been shown to be  
381 inessential for removing any chlorite produced if habitats have sufficient amounts of

382 reduced inorganic sulfur species<sup>67,68</sup> or large populations of other organisms that can  
383 degrade chlorate or chlorite<sup>19,61</sup>. The above results show that chlorite stress from co-  
384 metabolic (per)chlorate reduction is a common enough phenomenon that Cld has  
385 repeatedly evolved to be co-located with co-metabolic reductase in genomes.  
386 This is a contemporary example of how respiratory metabolisms for oxidized chlorine  
387 could have first arose from the association between chlorite dismutase and a co-  
388 metabolic reductase that later evolved to be specialized for perchlorate or chlorate  
389 reduction<sup>69</sup>. If true, that might suggest that in geologic time chlorite was of  
390 consequence in biology before chlorate and perchlorate.

391

### 392 *Chlorite from Chlorine Oxidation*

393

394 The oxidation of chlorine to chlorite is another possible reason, other than co-metabolic  
395 reduction of (per)chlorate or chemical reduction of chlorate<sup>70</sup>, why chlorite affects so  
396 many diverse microorganisms in oxic habitats. A pathway for this reaction is uncertain. If  
397 it occurs, Cld should be present in organisms unable to co-metabolically reduce  
398 (per)chlorate. Using profile-HMMs representing the broad parts of the DMSO reductase  
399 family phylogeny that have perchlorate or chlorate reductase activity (PCRA) (Figure  
400 4A), we identified genomes with Cld that do not have enzymes that reduce perchlorate  
401 or chlorate (Figure 5A). Despite the commonality of such enzymes as assimilatory nitrate  
402 reductases, this search identified 27 putative “non-(per)chlorate reducers” among  
403 isolate genomes (Supplementary Table 1). These strains represent 6 of the 19 phyla with  
404 Cld and 15 of 151 genera (Figure 5B). All are aerobes, and none were reported to be  
405 facultative anaerobes or obligate anaerobes (Figure 5B). They were isolated from  
406 diverse habitats, often characterized by high sunlight (lakes and ponds, desert rocks and  
407 sediments, growing with diatoms, cyanobacteria, or mosses) or by high amounts of  
408 reactive chlorine species (human body, wastewater treatment plant, swimming pool,  
409 showerhead biofilm) (Figure 5B). Therefore, in many habitats, the known mechanisms  
410 for the enzymatic reduction of chlorate and perchlorate appeared insufficient to explain  
411 the prevalence of chlorite and chlorite-degrading organisms.

412

413 One plausible route of oxidative chlorite formation is photochemistry (Figure 5C).  
414 Habitats with high sunlight are very oxidizing due to the combined effects of oxygenic  
415 phototrophy and UV photochemistry<sup>71,72</sup>. Several non-(per)chlorate reducers were  
416 isolated from high sunlight habitats. UV tolerance genes were present in Cld genomic  
417 neighborhoods from several bacteria from high sunlight habitats. A putative  
418 deoxyribodipyrimidine photo-lyase, which is a light-activated protein that repairs UV-  
419 damaged DNA, is encoded in 21 Cld genomic neighborhoods and several different  
420 neighborhood groups (groups 2, 20, and 7), such as one in a betaproteobacterium in  
421 culture with *Leptolyngbya glacialis* TM1FOS73 (GCA\_003242045.1)<sup>73</sup>. In a sunlight  
422 photobioreactor metagenome, *cld* is found in four of 34 MAGs (UBA7691, UBA7681,  
423 UBA7678, UBA7677), including a *Planctomycetaceae* bacterium that has periplasmic  
424 group 2a Cld encoded near carotenoid biosynthesis genes for limiting UV photodamage  
425<sup>74</sup>. The production of chlorite from oxidative chemistry might also explain the presence

426 of Cld in the nitrite-oxidizing bacteria (Figure 5C). Like the products of photochemistry,  
427 reactive nitrogen species nitric oxide (NO) and peroxynitrite (ONOO<sup>-</sup>) have high  
428 reduction potentials and can oxidize various molecules, producing other reactive species  
429 such as carbonate radicals<sup>75,76</sup>.

430

431 Another plausible route of chlorine oxidation is the biochemical oxidation of  
432 hypochlorous acid to chlorite (Figure 5C). An enzyme that oxidizes hypochlorous acid to  
433 chlorite would be a major fitness benefit to organisms with Cld. Oxidation of  
434 hypochlorous acid to chlorite only requires transfer of 2 electrons and produces a less  
435 reactive product. An analogous system would be nitric oxide dioxygenase, which uses  
436 oxygen to oxidize nitric oxide to less-toxic nitrate<sup>77</sup>. With Cld, oxidation of hypochlorous  
437 acid to chlorite would ultimately yield harmless chloride and oxygen. Instead of  
438 spending cellular reducing equivalents to reduce hypochlorous acid or repair oxidative  
439 damage, the enzymatic oxidation of hypochlorous acid might produce reducing  
440 equivalents. Furthermore, the removal of hypochlorous acid would limit the inhibition  
441 of Cld by hypochlorous acid<sup>78</sup>. Thus, the enzymatic oxidation of hypochlorous acid to  
442 chlorite would pose major selective benefits, if it occurs.

443

444 Experimental support for this capability would be the enrichment of organisms with Cld  
445 in habitats with high hypochlorous acid. One such real-world setting appeared to be a  
446 drinking water distribution system in which of 47 of 89 strains isolated from a  
447 showerhead biofilm encoded Cld, and 10 were non-(per)chlorate reducers (Figure 5D)<sup>79</sup>  
448<sup>80</sup>. This demonstrates a strong selection for Cld within the microbial community by the  
449 chlorine residuals present in the water. The water distribution system was expected to  
450 contain 0.8 mg/liter free residual chlorine form of hypochlorous acid and hypochlorite  
451 (ClO<sup>-</sup>) residuals; however, it is unclear if chlorine dioxide was used in water treatment  
452 and produced chlorite residuals (personal communication, Jorge Santo-Domingo).  
453 Except for this uncertainty, this system would meet the criteria of a habitat that selects  
454 for the ability to degrade chlorite due to only high hypochlorous acid exposure.  
455 Enzymatic oxidation of hypochlorous acid to chlorite remains an unproven hypothesis.

456

#### 457 *A Holistic Model for Chlorine Redox Biology*

458

459 The different biological processes that involve Cld suggest that the biology of chlorine  
460 reduction and oxidation should be considered as a single, bidirectional pathway (Figure  
461 6). In this model of chlorine in biology, based both on the above genomic data and  
462 previous studies, organisms in many habitats can experience any chlorine oxyanion  
463 (HOCl, ClO<sub>2</sub><sup>-</sup>, ClO<sub>3</sub><sup>-</sup>, ClO<sub>4</sub><sup>-</sup>) and some anthropogenic oxidized chlorine species (Cl<sub>2</sub>, ClO<sub>2</sub>,  
464 NH<sub>2</sub>Cl, NHCl<sub>2</sub>, and NCl<sub>3</sub>). Transporters appear to allow oxidized chlorine species to enter  
465 cells, where the molecules or their byproducts may be sensed and lead to changes in  
466 gene regulation.

467

468 Perchlorate, chlorate, chlorite, or hypochlorous acid, oxidized chlorine species have a  
469 propensity to be reduced in cells to the next lower oxidation state. Chlorite is produced

470 in organisms with enzymes that can reduce perchlorate and chlorate through  
471 metabolism or co-metabolism. Cld can be considered a shunt in the reductive pathway  
472 that, when present, prevents the formation of hypochlorous acid and produces  
473 beneficial oxygen. This shunt is found in approximately 1% of microbial genomes and  
474 enriched in particular groups of bacteria.

475  
476 If hypochlorous acid is formed, whether through reduction or oxidation, it reacts rapidly  
477 with biomolecules, producing a combination of chloride, chlorinated carbon and  
478 nitrogen, and oxidized byproducts<sup>4-6,81</sup>. In addition to protein repair and other  
479 traditional responses to oxidative stress, a number of uncharacterized genes linked to  
480 Cld suggest a broader enzymatic response to oxidized chlorine species. A hypothetical  
481 possibility is that organisms detoxify hypochlorous acid by oxidizing hypochlorous acid  
482 to chlorite and using the chlorite dismutase shunt to degrade chlorite. In oxidizing  
483 settings, chlorite can be further oxidized (photo)chemically to chlorate or perchlorate,  
484 which are also deposited into habitats from atmosphere. The relatively stable end  
485 products of this bidirectional cycle are perchlorate and chloride. These compounds are  
486 only as inert, however, as the surrounding chemistry and biology allow.

## 487 **Conclusions**

488  
489  
490 Cld, a biomarker for chlorite once thought unique to anaerobic perchlorate- and  
491 chlorate-reducing bacteria, is found in various microorganisms from both oxic and  
492 anoxic microbial habitats. This distribution suggests organisms experience significant  
493 enough amounts of chlorite in the environment to acquire Cld. The sources of chlorite  
494 are the dissimilatory reduction of (per)chlorate but also the co-metabolic reduction of  
495 (per)chlorate and, genomics suggests, the oxidation of chlorine's lower oxidation states.  
496 That Cld participates in these pathways and in general response to reactive chlorine  
497 species justifies a model wherein oxidized chlorine species are part of a continuous,  
498 bidirectional biological pathway. Cld is subject to intermittent selection for its gain and  
499 loss, highlighting how much remains to be learned about the concentrations and fluxes  
500 of oxidized chlorine species in different environments. The expansive inventory of genes  
501 associated with Cld-encoding loci identified here provides targets for subsequent  
502 research in the biology of oxidized chlorine from regulation, transport, and repair to  
503 direct enzymatic action on chlorine-containing molecules.

## 504 **Methods**

### 505 *Identification of chlorite dismutase (Cld)*

506  
507  
508  
509 A maximum likelihood phylogenetic tree of the protein family containing Cld was  
510 constructed using FastTree from the Pfam 06778 alignment of representative  
511 proteomes, at the 15% comembership threshold to limit the number of redundant  
512 proteins<sup>82-84</sup>. The presence of key residues for Cld activity were identified by comparing  
513 the positions in the alignment corresponding to the distal heme arginine (R127) and



514 proximal heme lysine (K92), histidine (H114), and glutamic acid (E167) in *Nitrobacter*  
515 *winogradskyi* Nb-255<sup>32</sup>. Proteins in the two major lineages of Cld were used to  
516 construct profile-hidden Markov models (HMMs) later used to identify Cld proteins<sup>85</sup>.  
517 Cld and non-Cld proteins were annotated on a precomputed bacterial tree of life<sup>86</sup>.

518

519 BLASTP was used to identify Cld in genomes in the JGI IMG/M, NCBI GenBank, and NCBI  
520 RefSeq databases, with RefSeq preferred<sup>87-89</sup>. BLASTP was used to identify  
521 metagenomic Cld in JGI IMG/M among the largest metagenomes consisting of 90% of  
522 proteins in each “Ecosystem Category.” Metagenome-assembled genomes in the  
523 Uncultivated Bacteria and Archaea (UBA) dataset were searched directly with profile-  
524 HMMs<sup>90</sup>. All Cld identified with BLASTP were confirmed with profile-HMMs. Genomic  
525 data and metadata were processed using custom scripts. Data were downloaded prior  
526 to 2020.

527

528 The fraction of a taxonomic group encoding Cld was determined by comparing the  
529 number of RefSeq genomes with the *cld* gene to the total number of RefSeq genomes  
530 available within each taxonomic group ([https://github.com/kblin/ncbi-genome-](https://github.com/kblin/ncbi-genome-download)  
531 [download](https://github.com/kblin/ncbi-genome-download)). The detection of Cld in different environments was compared using the  
532 number of *cld* copies per million total coding domain sequences (CDS) obtained from  
533 IMG/M metagenome metadata. Due to inconsistent definitions of environments in  
534 IMG/M, metadata were using to assign each metagenome were assigned to a custom  
535 environmental category.

536

### 537 *Phylogenetics*

538

539 Cld proteins were aligned using MUSCLE v3.8.1551<sup>91</sup> and built into a maximum  
540 likelihood phylogenetic tree using FastTree<sup>84</sup>. The Python package ETE v. 3 was used to  
541 plot trees and to form clades of proteins at trees nodes in which the average distance to  
542 a protein was less than a selected value<sup>92</sup>. N-terminal and C-terminal extensions were  
543 defined as amino acids in the alignment beyond the positions within which the average  
544 Cld protein had amino acids. Signal peptides were assigned using SignalP v. 5, accepting  
545 a positive result from any type of organism (gram-negative, gram-positive, or  
546 eukaryotic)<sup>93</sup>.

547

548 Proteins in the DMSO reductase family of molybdopterin enzymes, which might function  
549 as perchlorate and chlorate reductases, were identified using a profile-HMM built from  
550 the seed alignment of Pfam 00384<sup>82,85</sup>. A maximum likelihood phylogenetic tree was  
551 constructed from those proteins encoded near *cld* and a curated set of proteins from  
552 Pfam 00384 proteins in representative proteomes at the 15% comembership threshold.  
553 Incomplete proteins were excluded using a size threshold of 300 amino acids, the size of  
554 dataset was reduced while maintaining diversity by clustering proteins at 50% amino  
555 acid identity using CD-HIT. Only positions in the alignment where a majority of proteins  
556 had residues were kept. The tree was constructed, plotted, and grouped into clades as  
557 above.

558

559 *Comparative genomics*

560

561 Genes within +/- 10 positions of *clid* on the same contig were defined as part of the Cld  
562 genomic neighborhood. To compare neighborhoods, similar proteins in the  
563 neighborhood were clustered into protein subfamilies using MMSEQs v.7-4e23d set to a  
564 coverage of 0.5 and an E-value of 0.001<sup>94</sup>. The two major lineages of Cld were each  
565 defined as a separate subfamily, and subfamilies were numbered in order of their size in  
566 this dataset.

567

568 A simple statistic for gene linkage to *clid* was obtained by representing each subfamily as  
569 a node and each connection between subfamilies found in the same genomic  
570 neighborhood as edges in a network. The Python package networkx was used to  
571 compute a clustering coefficient for each node: the fraction of a node's neighbors with  
572 an edge over the total number of edges possible between a node's neighbors.

573

574 To simplify analysis, genomic neighborhoods with 10+ genes were grouped by similar  
575 gene content using unsupervised machine learning methods in the Python package  
576 SciKit-learn. The features of the data were the presence (1) or absence (0) of each  
577 subfamily in the neighborhood. An initial dimensional reduction was performed with  
578 Principle Components Analysis, and the resulting 50 dimensions per neighborhood were  
579 subject to t-Distributed Stochastic Neighbor Embedding (t-SNE) with a perplexity of 50  
580 and 5,000 iterations. Neighborhoods were then clustered into groups close to each  
581 other in the two t-SNE dimensions with the Density-Based Spatial Clustering of  
582 Applications with Noise (DBSCAN) algorithm.

583

584 In select instances, genes were compared to fitness experiments using chlorite and  
585 chlorate on the Fitness Browser ([fit.genomics.lbl.gov](http://fit.genomics.lbl.gov)) described in Price et. al 2018.

586

587 *Data Availability*

588

589 Supplementary data are available on FigShare and include: Supplementary Data 1,  
590 information on genes and genomes used in this work including accessions, taxonomy,  
591 subfamily assignments, etc. (doi:10.6084/m9.figshare.16978561); Supplementary Data  
592 2, information on subfamilies and their clustering coefficients  
593 (doi:10.6084/m9.figshare.16980601); protein sequences found in Cld genomic  
594 neighborhoods (doi:10.6084/m9.figshare.16980613); a phylogenetic tree and  
595 alignments for Cld (doi:10.6084/m9.figshare.16982077); and profile-HMMs to identify  
596 key proteins for perchlorate, chlorate, and chlorite biology.

597

598 **Acknowledgements**

599

600 This work would not be possible without the sequencing of microorganisms and  
601 microbial communities by countless scientists, for whom we are in continual gratitude.

602 We also thank Shengqiang Shu and Joe Carlson of the Joint Genome Institute, Hirotugu  
603 Fujitani, Jorge Santo-Domingo, and Kostas Konstantinidis, and for their personal  
604 communication regarding their work. Financial support was provided through a grant  
605 from the Energy Biosciences Institute EBI-BP program to J.D.C. and through the NSF  
606 Graduate Research Fellowship Program to T.P.B.

607

#### 608 **Author Contributions**

609

610 T.P.B. conceived of and performed all research with the guidance and supervision of  
611 J.D.C. T.P.B. and J.D.C analyzed results, wrote the manuscript, and approved its  
612 publication.

613

#### 614 **Conflict of Interest Statement**

615

616 The authors declares no conflicts of interest.

## 617 Figures

618

619 *Figure 1.* The distribution of Cld across genomes and metagenomes. (A) A maximum-  
620 likelihood phylogenetic tree of Pfam 06778, rooted to match Zámocký, et al. <sup>35</sup>. Color  
621 indicates the number of the 4 key residues for Cld activity in each protein. The number  
622 of proteins with each fraction of key residues, and the phylogenetic distribution of those  
623 proteins, is summarized at right. (B) A tree of all bacterial genomes annotated with the  
624 presence Pfam 06778 proteins, comparing the distribution of non-Cld proteins (left,  
625 gray) and Cld proteins (right, blue). (C) The total number of each Cld lineage detected in  
626 genomes and metagenomes. (D-E) The number (left) and percent (right) genomes within  
627 a given RefSeq phylum or genus. For simplicity, only genera with more than one genome  
628 encoding Cld and either 20+ genomes or >20% genomes encoding Cld are shown. (F)  
629 The number of Cld (left) and fraction of *cld* per million genes (right) in different  
630 environments. Only environments with a sample size of more than 10 million genes are  
631 shown. Assuming an average of 5,000 genes per bacterial genome, 1 cld per 1,000,000  
632 genes means that roughly 0.5% of bacterial genomes in a habitat encode Cld.

633

634 *Figure 2.* The phylogeny of Cld proteins and attributes of each lineage. (A) A maximum  
635 likelihood phylogenetic tree of Cld, with clades formed by phylogenetic distance and  
636 node support values indicated by color. Clades containing biochemically verified Cld  
637 proteins are indicated by a checkmark, and clades containing sequences used in the  
638 initial search are indicated by a magnifying glass. Major lineages of Cld are demarcated  
639 by dashed lines. The number of Cld per clade is listed at right and represented in a  
640 barplot by whether the source is genomic and metagenomic. (B) The primary structure  
641 of each clade. The proportion of each Cld clade computationally identified to have each  
642 key residue from 0% (white) to 100% (black) (left); the proportion of the clade  
643 computationally predicted to have a signal peptide (black) for export to the periplasm  
644 (center); and length of proteins in the clade represented as a boxplot where the box  
645 represents the interquartile range, whiskers represent maximum and minimum values,  
646 and the gray line represents the mean of all Cld (right). (C) Detection of Cld in each  
647 taxonomic class indicated by filled squares (left). Stacked barplots represent the  
648 proportion of each Cld clade in each environment (left) or each taxonomic class (right).  
649 (D) A measure of recent horizontal gene transfer: the number of genera found in each  
650 clade, with genera that can share an identical copy of Cld colored orange.

651

652 *Figure 3.* Statistical analysis of Cld genomic neighborhoods. (A) Schematic diagram  
653 explaining analyses. Genomic neighborhoods are compared using proteins clustered  
654 into protein subfamilies. In the gene-centric analysis, the co-occurrence of genes in  
655 different neighborhoods is used to construct a network, from which a clustering  
656 coefficient for each gene is derived. In the neighborhood-centric analysis,  
657 neighborhoods with more similar gene content are plotted through several dimensional  
658 reduction steps and clustered. (B) The distribution of protein subfamilies by their  
659 clustering coefficient, a measure of linkage to *cld*. The threshold value for defining “hits”  
660 is indicated. (C) Cld genomic neighborhoods colored by group, indicating the top three

661 most common proteins subfamilies in each group. Genomic neighborhoods that did not  
662 cluster into distinct groups are found in neighborhood group 7. (D). Cld genomic  
663 neighborhoods colored by the presence of group 1 Cld (left), by the presence or absence  
664 of reductases closely related to Pcr, Clr, and Nar (center), or by the phylum of the host  
665 organism (right).

666

667 *Figure 4.* The distribution of Cld among possible perchlorate and chlorate reductases in  
668 the DMSO reductase family. (A) The pathways by which a reductase can produce  
669 chlorite, which Cld degrades. Dissimilatory reduction occurs through perchlorate  
670 reductase (red, Pcr) or chlorate reductase (orange, Clr). Co-metabolic reduction (green)  
671 does not occur through a reductase specialized for perchlorate or chlorate reduction. An  
672 example is shown for nitrate reductase (Nar). (B) An unrooted maximum likelihood  
673 phylogenetic tree of representative proteins from the DMSO reductase family. Clades  
674 containing proteins from Cld genomic neighborhoods are highlighted in blue. (C) The  
675 same phylogenetic tree omitting all proteins not found with Cld. Colors indicate their  
676 source (genomic or metagenomic). Labels at right indicate the type of protein and the  
677 lineages of Cld present in their genomic neighborhood. (D) The number of genomes per  
678 genus or other taxon with proteins from PcrA, ClrA1, ClrA2, or ClrA3, and whether or not  
679 the organisms were subjected to selection for those genes (i.e. providing perchlorate or  
680 chlorate as a sole respiratory electron acceptor). Metagenomic proteins were assigned  
681 to the closest genomic relative's taxon. (E) The number of Cld-associated proteins in  
682 each clade of the DMSO reductase tree and whether they were obtained from genomes  
683 and metagenome-assembled genomes (black) or metagenomes (blue).

684

685 *Figure 5.* Genomes without respiratory and co-metabolic perchlorate/chlorate reductase  
686 activity (PCRA). (A) Profile-HMMs were used to find isolated microorganisms without  
687 enzymes from the broad parts of the DMSO reductase family that might have  
688 (per)chlorate reductase activity. These organisms may experience chlorite produced  
689 from oxidative chemistry. (B) The number of isolate genomes with respiratory or co-  
690 metabolic reductases grouped by phylum, relationship with oxygen, and the habitat  
691 they were isolated from (C) Pathways discussed in the text as having the potential to  
692 generate chlorite from lower oxidation states of chlorine. (D) Several organisms without  
693 PCRA were isolated from a showerhead biofilm communities exposed to chlorine  
694 residuals present in drinking water. Bars indicate the number of organisms isolated from  
695 that community with or without Cld or enzymes with putative (per)chlorate reductase  
696 activity.

697

698 *Figure 6.* A model for biological chlorine reduction and oxidation reactions occurring  
699 within biological habitats. Biological (solid arrows, bold) and chemical or photochemical  
700 (dashed arrows) reduction and oxidation reactions of chlorine that occur, in aqueous  
701 solution or within microbial cells. Halogenases, the primary source of organochlorine,  
702 are omitted for simplicity. Other oxidized chlorine species can be external inputs into  
703 biological systems (blue). Vertical position corresponds to changes in chlorine's formal  
704 oxidation state and reduction potential at standard conditions (pH 7, 25 °C, solutes at 1

705 M) in millivolts (gray). Additional factors that influence chlorine redox biology but do not  
706 perform redox reactions are shown: habitat (pH, redox potential, etc.), cellular  
707 composition including transporters, and cellular signaling and responses. Abbreviations:  
708 R-N<sub>x</sub>Cl<sub>y</sub>, organic and inorganic chloramines; R<sub>x</sub>-Cl<sub>y</sub>, organochlorine; ClO<sub>2</sub>, chlorine  
709 dioxide; Cl<sub>2</sub>, molecular chlorine.

710  
711  
712  
713  
714  
715  
716  
717  
718  
719  
720  
721  
722  
723  
724  
725  
726  
727  
728  
729  
730  
731  
732  
733  
734  
735  
736  
737  
738  
739  
740  
741  
742  
743  
744  
745  
746  
747  
748

749 **Tables**

750

751

752

753

754

755

756

Table 1. Genetic linkage of protein subfamilies to Cld. All subfamilies with a network clustering coefficient of less than 0.1 are shown. Columns: SID, subfamily ID; CC, clustering coefficient; Gene Function, the predicted role for the gene in chlorine oxyanion biology; Length (aa), mean protein length; Count, total number of genes in the in the subfamily found in Cld genomic neighborhoods; and Examples, RefSeq accession for proteins in the subfamily from different classes of organisms.

| SID   | CC    | Gene Product                                             | Gene Function                     | Length (aa) | Count | Examples                       |
|-------|-------|----------------------------------------------------------|-----------------------------------|-------------|-------|--------------------------------|
| cld_2 | 0.002 | Chlorite dismutase, group 2                              | Chlorite degradation              | 188         | 7721  | NP_773991.1, NP_924112.1       |
| cld_1 | 0.019 | Chlorite dismutase, group 1                              | Chlorite degradation              | 264         | 1069  | WP_011288310.1, WP_013247962.1 |
| 3     | 0.026 | Cupin domain-containing protein                          | Unknown                           | 131         | 1591  | WP_083761619.1, WP_011914407.1 |
| 19    | 0.027 | ABC transporter ATP-binding protein                      | Transport                         | 285         | 215   | WP_008060994.1, WP_083842800.1 |
| 16    | 0.028 | tRNA                                                     | Genetic mobility                  | -           | 260   |                                |
| 8     | 0.029 | SDR family NAD(P)-dependent oxidoreductase               | Unknown                           | 258         | 409   | NP_773983.1, WP_012078779.1    |
| 23    | 0.042 | Site-specific DNA recombinase                            | Genetic mobility                  | 193         | 201   | WP_012435588.1, WP_001556711.1 |
| 80    | 0.050 | Sigma-70 factor (ECF subfamily)                          | Regulation                        | 217         | 70    | NP_924104.1, WP_026605404.1    |
| 67    | 0.060 | Signal transduction histidine kinase                     | Regulation                        | 440         | 79    | WP_003032875.1, WP_085107402.1 |
| 4     | 0.063 | Transposase (IS66 family)                                | Genetic mobility                  | 157         | 1202  | WP_001515734.1                 |
| 66    | 0.067 | DNA-binding transcriptional regulator (LysR family)      | Regulation                        | 298         | 81    | WP_020307717.1, WP_012435586.1 |
| 88    | 0.068 | DNA-binding response regulator (OmpR family)             | Regulation                        | 226         | 65    | WP_020177235.1, WP_001572351.1 |
| 53    | 0.071 | DNA-binding response regulator (NarL/FixJ/NrtC family)   | Regulation                        | 188         | 86    | WP_012078773.1, WP_007803317.1 |
| 34    | 0.072 | Site-specific recombinase (XerD family)                  | Genetic mobility                  | 321         | 139   | WP_011914410.1                 |
| 85    | 0.072 | NADPH:quinone reductase-like Zn-dependent oxidoreductase | Unknown                           | 332         | 68    | WP_008175571.1, WP_007535313.1 |
| 1     | 0.073 | Thermonuclease family protein                            | Genetic mobility                  | 92          | 2334  | WP_000046891.1                 |
| 119   | 0.073 | Signal transduction histidine kinase (NrtC family)       | Regulation                        | 650         | 51    | WP_014235261.1, WP_066325839.1 |
| 15    | 0.074 | Transposase (IS26 family)                                | Genetic mobility                  |             | 269   | WP_031992596.1, WP_038573166.1 |
| 33    | 0.074 | Integrase                                                | Genetic mobility                  | 677         | 144   | WP_011914409.1                 |
| 60    | 0.074 | DUF4113 domain-containing DNA polymerase                 | Genetic mobility                  | 321         | 84    | WP_080695106.1, WP_043755420.1 |
| 71    | 0.074 | Translesion error-prone DNA polymerase V, umuD           | DNA repair or salvage             | 134         | 77    | WP_011914412.1, WP_043760689.1 |
| 99    | 0.075 | DNA-binding transcriptional regulator (LysR family)      | Regulation                        | 296         | 57    | WP_012078780.1, WP_012237598.1 |
| 64    | 0.077 | Perchlorate/chlorate reductase, subunit beta             | Perchlorate or chlorate reduction | 323         | 81    | WP_011288313.1, WP_029134664.1 |
| 57    | 0.081 | Perchlorate/chlorate reductase, subunit delta            | Perchlorate or chlorate reduction | 212         | 84    | WP_049758697.1, WP_037375986.1 |

|     |       |                                                                         |                                   |     |     |                                |
|-----|-------|-------------------------------------------------------------------------|-----------------------------------|-----|-----|--------------------------------|
| 70  | 0.081 | TTT family transporter, receptor subunit                                | Transport                         | 294 | 77  | WP_009515871.1, WP_082751643.1 |
| 61  | 0.082 | Perchlorate/chlorate reductase, subunit alpha                           | Perchlorate or chlorate reduction | 904 | 83  | WP_011288314.1, WP_037375984.1 |
| 55  | 0.082 | Alpha/beta hydrolase family protein                                     | Unknown                           | 279 | 85  | WP_009734230.1, WP_026779386.1 |
| 205 | 0.083 | Enoyl-CoA hydratase/isomerase family protein                            | Unknown                           | 228 | 33  | WP_019497504.1, WP_083525184.1 |
| 77  | 0.084 | Acetate-CoA ligase                                                      | Unknown                           | 508 | 71  | WP_009734228.1, WP_060979399.1 |
| 37  | 0.085 | RCS-sensing anti-sigma factor, DUF1109 domain-containing                | Oxidative stress response         | 208 | 132 | WP_011288319.1, WP_003549388.1 |
| 54  | 0.085 | Transposase (Tn3 family)                                                | Genetic mobility                  | 813 | 85  | WP_012077404.1, WP_000124025.1 |
| 6   | 0.085 | Gamma-glutamylcyclotransferase family protein                           | Oxidative stress response         | 114 | 665 | NP_773992.1                    |
| 116 | 0.085 | Alpha/beta hydrolase family protein                                     | Unknown                           | 281 | 52  | WP_040512021.1, WP_063988050.1 |
| 240 | 0.086 | NAD(P)-dependent oxidoreductase                                         | Unknown                           | 310 | 29  | WP_017285547.1, WP_020564915.1 |
| 62  | 0.088 | RCS-sensing sigma factor                                                | Regulation                        | 177 | 83  | WP_011288320.1, WP_003549387.1 |
| 93  | 0.091 | NAD(P)/FAD oxidoreductase, glutathione sulfide reductase-like           | Oxidative stress response         | 488 | 61  | WP_008567178.1, WP_003158917.1 |
| 84  | 0.091 | Alkylhydroperoxidase, AhpD-like                                         | Oxidative stress response         | 182 | 68  | WP_007535291.1, WP_036008191.1 |
| 97  | 0.091 | Plasmid stabilization system toxin                                      | Genetic mobility                  | 97  | 59  | WP_011342942.1, WP_094538652.1 |
| 107 | 0.091 | Nitrate/sulfonate/bicarbonate ABC transporter permease                  | Transport                         | 279 | 54  | WP_007803303.1, WP_023100455.1 |
| 123 | 0.092 | Peroxiredoxin                                                           | Oxidative stress response         | 165 | 50  | WP_020096154.1, WP_058937083.1 |
| 95  | 0.092 | Plasmid stabilization system antitoxin                                  | Genetic mobility                  | 91  | 60  | WP_011342941.1, WP_011342941.1 |
| 11  | 0.092 | DNA primase                                                             | Genetic mobility                  | 604 | 310 | NP_773990.1                    |
| 128 | 0.093 | Class I SAM-dependent methyltransferase                                 | Unknown                           | 228 | 48  | WP_025297811.1, WP_083129309.1 |
| 22  | 0.093 | DNA-binding transcriptional regulator (ArsR family)                     | Regulation                        | 110 | 205 | NP_773999.1, WP_103275825.1    |
| 14  | 0.095 | N-formylglutamate amidohydrolase                                        | Oxidative stress response         | 264 | 292 | NP_773994.1                    |
| 13  | 0.096 | Adenylosuccinate lyase                                                  | DNA repair or salvage             | 425 | 304 | WP_013247961.1, WP_033925750.1 |
| 162 | 0.098 | Peptide-methionine (S)-S-oxide reductase                                | Oxidative stress response         | 203 | 38  | WP_081614707.1, WP_003464967.1 |
| 110 | 0.098 | DNA-binding transcriptional regulator (HxIR family)                     | Regulation                        | 137 | 53  | WP_015215298.1, WP_036002077.1 |
| 120 | 0.098 | Nitrate/sulfonate/bicarbonate ABC transporter substrate-binding protein | Transport                         | 422 | 51  | WP_007803301.1, WP_023100454.1 |
| 74  | 0.099 | DNA polymerase V, umuC                                                  | Genetic mobility                  | 73  | 75  | WP_011914411.1                 |
| 177 | 0.100 | Ferredoxin of nitrite reductase or dioxygenase                          | Unknown                           | 110 | 36  | WP_041756587.1, WP_005004323.1 |
| 129 | 0.100 | Glutathione S-transferase family protein                                | Oxidative stress response         | 211 | 48  | WP_015215307.1, WP_025659664.1 |
| 159 | 0.100 | Peptide-methionine (R)-S-oxide                                          | Oxidative stress                  | 167 | 38  | WP_019497506.1,                |



|  |  |           |          |  |  |                |
|--|--|-----------|----------|--|--|----------------|
|  |  | reductase | response |  |  | WP_003464965.1 |
|--|--|-----------|----------|--|--|----------------|

757

758

759 **References**

760

- 761 1 Atashgahi, S. *et al.* Microbial Synthesis and Transformation of Inorganic and  
762 Organic Chlorine Compounds. *Frontiers in Microbiology* **9**, 1-22,  
763 doi:10.3389/fmicb.2018.03079 (2018).
- 764 2 Winterton, N. Chlorine: the only green element – towards a wider acceptance  
765 of its role in natural cycles. *Green Chemistry* **2**, 173-225,  
766 doi:10.1039/b003394o (2000).
- 767 3 Agarwal, V. *et al.* Enzymatic Halogenation and Dehalogenation Reactions:  
768 Pervasive and Mechanistically Diverse. *Chemical Reviews*,  
769 acs.chemrev.6b00571, doi:10.1021/acs.chemrev.6b00571 (2017).
- 770 4 Bengtson, P., Bastviken, D., de Boer, W. & Oberg, G. Possible role of reactive  
771 chlorine in microbial antagonism and organic matter chlorination in  
772 terrestrial environments. *Environ Microbiol* **11**, 1330-1339,  
773 doi:10.1111/j.1462-2920.2009.01915.x (2009).
- 774 5 Winterbourn, C. C. & Kettle, A. J. Redox reactions and microbial killing in the  
775 neutrophil phagosome. *Antioxid Redox Signal* **18**, 642-660,  
776 doi:10.1089/ars.2012.4827 (2013).
- 777 6 Comba, P., Kerscher, M., Krause, T. & Schöler, H. F. Iron-catalysed oxidation  
778 and halogenation of organic matter in nature. *Environmental Chemistry* **12**,  
779 doi:10.1071/en14240 (2015).
- 780 7 Gray, M. J., Wholey, W.-Y. & Jakob, U. Bacterial responses to reactive chlorine  
781 species. *Annual review of microbiology* **67**, 141-160, doi:10.1146/annurev-  
782 micro-102912-142520 (2013).
- 783 8 Youngblut, M. D., Wang, O., Barnum, T. P. & Coates, J. D. (Per)chlorate in  
784 Biology on Earth and Beyond. *Annual Review of Microbiology* **70**, 435-459,  
785 doi:10.1146/annurev-micro-102215-095406 (2016).
- 786 9 Winterbourn, C. C. Reconciling the chemistry and biology of reactive oxygen  
787 species. *Nature Chemical Biology* **4**, 278-286, doi:10.1038/nchembio.85  
788 (2008).
- 789 10 Deborde, M. & von Gunten, U. Reactions of chlorine with inorganic and  
790 organic compounds during water treatment - Kinetics and mechanisms: A  
791 critical review. *Water Research* **42**, 13-51, doi:10.1016/j.watres.2007.07.025  
792 (2008).
- 793 11 Asami, M., Kosaka, K. & Kunikane, S. Bromate, chlorate, chlorite and  
794 perchlorate in sodium hypochlorite solution used in water supply. *Journal of*  
795 *Water Supply: Research and Technology - AQUA* **58**, 107-115,  
796 doi:10.2166/aqua.2009.014 (2009).
- 797 12 Coates, J. D. & Achenbach, L. A. Microbial perchlorate reduction: rocket-fueled  
798 metabolism. *Nature Reviews Microbiology* **2**, 569-580,  
799 doi:10.1038/nrmicro926 (2004).
- 800 13 Leri, A. C. *et al.* A marine sink for chlorine in natural organic matter. *Nature*  
801 *Geoscience* **8**, 620-624, doi:10.1038/NCEO2481 (2015).
- 802 14 Ortiz-Bermudez, P., Hirth, K. C., Srebotnik, E. & Hammel, K. E. Chlorination of  
803 lignin by ubiquitous fungi has a likely role in global organochlorine  
804 production. *PNAS* **104**, 3895-3900 (2007).

- 805 15 Rao, B. *et al.* Perchlorate production by photodecomposition of aqueous  
806 chlorine solutions. *Environ Sci Technol* **46**, 11635-11643,  
807 doi:10.1021/es3015277 (2012).
- 808 16 Rajagopalan, S. *et al.* Perchlorate in wet deposition across North America.  
809 *Environmental Science and Technology* **43**, 616-622, doi:10.1021/es801737u  
810 (2009).
- 811 17 Dasgupta, P. K. *et al.* The origin of naturally occurring perchlorate: The role of  
812 atmospheric processes. *Environmental Science and Technology* **39**, 1569-  
813 1575, doi:10.1021/es048612x (2005).
- 814 18 Youngblut, M. D. *et al.* Perchlorate reductase is distinguished by active site  
815 aromatic gate residues. *Journal of Biological Chemistry* **291**, 9190-9202,  
816 doi:10.1074/jbc.M116.714618 (2016).
- 817 19 Barnum, T. P. *et al.* Identification of a parasitic symbiosis between  
818 respiratory metabolisms in the biogeochemical chlorine cycle. *The ISME*  
819 *Journal*, doi:10.1038/s41396-020-0599-1 (2020).
- 820 20 Leimkühler, S. & Iobbi-Nivol, C. Bacterial molybdoenzymes: old enzymes for  
821 new purposes. *FEMS Microbiology Reviews* **40**, 1-18,  
822 doi:10.1093/femsre/fuv043 (2015).
- 823 21 Weiner, J. H., MacIsaac, D. P., Bishop, R. E. & Bilous, P. T. Purification and  
824 properties of *Escherichia coli* dimethyl sulfoxide reductase, an iron-sulfur  
825 molybdoenzyme with broad substrate specificity. **170**, 1505-1510,  
826 doi:10.1128/jb.170.4.1505-1510.1988 %J Journal of Bacteriology (1988).
- 827 22 Hinsley, A. P. & Berks, B. C. Specificity of respiratory pathways involved in the  
828 reduction of sulfur compounds by *Salmonella enterica*. **148**, 3631-3638,  
829 doi:<https://doi.org/10.1099/00221287-148-11-3631> (2002).
- 830 23 Riggs, D. L., Tang, J. S. & Barrett, E. L. Thiosulfate reductase as a chlorate  
831 reductase in *Salmonella typhimurium*. *FEMS Microbiology Letters* **44**, 427-  
832 430, doi:10.1111/j.1574-6968.1987.tb02326.x %J FEMS Microbiology  
833 Letters (1987).
- 834 24 McEwan, A. G., Wetzstein, H. G., Meyer, O., Jackson, J. B. & Ferguson, S. J. The  
835 periplasmic nitrate reductase of *Rhodobacter capsulatus*; purification,  
836 characterisation and distinction from a single reductase for trimethylamine-  
837 N-oxide, dimethylsulphoxide and chlorate. *Archives of Microbiology* **147**, 340-  
838 345 (1987).
- 839 25 Celis, A. I. *et al.* A dimeric chlorite dismutase exhibits O<sub>2</sub>-generating activity  
840 and acts as a chlorite antioxidant in *Klebsiella pneumoniae* MGH 78578.  
841 *Biochemistry* **54**, 434-446, doi:10.1021/bi501184c (2015).
- 842 26 Schaffner, I. *et al.* Mechanism of chlorite degradation to chloride and  
843 dioxygen by the enzyme chlorite dismutase. *Archives of Biochemistry and*  
844 *Biophysics* **574**, 18-26, doi:10.1016/j.abb.2015.02.031 (2015).
- 845 27 Van Ginkel, C. G., Rikken, G. B., Kroon, A. G. M. & Kengen, S. W. M. Purification  
846 and characterization of chlorite dismutase: A novel oxygen-generating  
847 enzyme. *Archives of Microbiology* **166**, 321-326,  
848 doi:10.1007/s002030050390 (1996).

- 849 28 Dubois, J. L. O – O Bond Formation by a Heme Protein : The Unexpected  
850 Efficiency of Chlorite Dismutase. *Molecular Water Oxidation Catalysis: A Key*  
851 *Topic for New Sustainable Energy Conversion Schemes* (2014).
- 852 29 Rikken, G. B., Kroon, A. G. M. & Van Ginkel, C. G. Transformation of  
853 (per)chlorate into chloride by a newly isolated bacterium: reduction and  
854 dismutation. *Applied Microbiology and Biotechnology* **45**, 420-426,  
855 doi:10.1007/s002530050707 (1996).
- 856 30 Coates, J. D. *et al.* Ubiquity and diversity of dissimilatory (per)chlorate-  
857 reducing bacteria. *Applied and Environmental Microbiology* **65**, 5234-5241  
858 (1999).
- 859 31 Maixner, F. *et al.* Environmental genomics reveals a functional chlorite  
860 dismutase in the nitrite-oxidizing bacterium 'Candidatus Nitrospira defluvii'.  
861 *Environmental Microbiology* **10**, 3043-3056, doi:10.1111/j.1462-  
862 2920.2008.01646.x (2008).
- 863 32 Hofbauer, S. *et al.* From chlorite dismutase towards HemQ-the role of the  
864 proximal H-bonding network in haeme binding. *Bioscience reports* **36**,  
865 e00312, doi:10.1042/BSR20150330 (2016).
- 866 33 de Geus, D. C. *et al.* Crystal Structure of Chlorite Dismutase, a Detoxifying  
867 Enzyme Producing Molecular Oxygen. *Journal of Molecular Biology* **387**, 192-  
868 206, doi:<https://doi.org/10.1016/j.jmb.2009.01.036> (2009).
- 869 34 Celis, A. I. & DuBois, J. L. Substrate, product, and cofactor: The extraordinarily  
870 flexible relationship between the CDE superfamily and heme. *Archives of*  
871 *Biochemistry and Biophysics* **574**, 3-17, doi:10.1016/j.abb.2015.03.004  
872 (2015).
- 873 35 Zámocký, M. *et al.* Independent evolution of four heme peroxidase  
874 superfamilies. *Archives of Biochemistry and Biophysics* **574**, 108-119,  
875 doi:10.1016/j.abb.2014.12.025 (2015).
- 876 36 Dailey, H. a. & Gerdes, S. HemQ: An iron-coproporphyrin oxidative  
877 decarboxylase for protoheme synthesis in Firmicutes and Actinobacteria.  
878 *Archives of Biochemistry and Biophysics* **574**, 27-35,  
879 doi:10.1016/j.abb.2015.02.017 (2015).
- 880 37 Schaffner, I. *et al.* Dimeric chlorite dismutase from the nitrogen-fixing  
881 cyanobacterium *Cyanothece* sp. PCC7425. *Molecular Microbiology* **96**, 1053-  
882 1068, doi:10.1111/mmi.12989 (2015).
- 883 38 Mlynek, G. *et al.* Unexpected Diversity of Chlorite Dismutases: a Catalytically  
884 Efficient Dimeric Enzyme from *Nitrobacter winogradskyi*. **193**, 2408-2417,  
885 doi:10.1128/JB.01262-10 (2011).
- 886 39 Bogen, C. *et al.* Reconstruction of the lipid metabolism for the microalga  
887 *Monoraphidium neglectum* from its genome sequence reveals characteristics  
888 suitable for biofuel production. *BMC Genomics* **14**, 926, doi:10.1186/1471-  
889 2164-14-926 (2013).
- 890 40 Cary, S. C., McDonald, I. R., Barrett, J. E. & Cowan, D. A. On the rocks: the  
891 microbiology of Antarctic Dry Valley soils. *Nat Rev Microbiol* **8**, 129-138,  
892 doi:10.1038/nrmicro2281 (2010).

- 893 41 Maccario, L., Carpenter, S. D., Deming, J. W., Vogel, T. M. & Larose, C. Sources  
894 and selection of snow-specific microbial communities in a Greenlandic sea  
895 ice snow cover. *Sci Rep* **9**, 2290, doi:10.1038/s41598-019-38744-y (2019).
- 896 42 Dubois, J. L. & Ojha, S. Sustaining Life on Planet Earth: Metalloenzymes  
897 Mastering Dioxygen and Other Chewy Gases. **15**, 45-87, doi:10.1007/978-3-  
898 319-12415-5 (2015).
- 899 43 Lucker, S., Nowka, B., Rattei, T., Spieck, E. & Daims, H. The Genome of  
900 *Nitrospina gracilis* Illuminates the Metabolism and Evolution of the Major  
901 Marine Nitrite Oxidizer. *Front Microbiol* **4**, 27,  
902 doi:10.3389/fmicb.2013.00027 (2013).
- 903 44 Enright, A. J., Iliopoulos, I., Kyrpides, N. C. & Ouzounis, C. A. Protein  
904 interaction maps for complete genomes based on gene fusion events. *Nature*  
905 **402**, 86-90, doi:10.1038/47056 (1999).
- 906 45 Kitzinger, K. *et al.* Characterization of the First “Candidatus Nitrotoga” Isolate  
907 Reveals Metabolic Versatility and Separate Evolution of Widespread Nitrite-  
908 Oxidizing Bacteria. *MBio* **9**, e01186-01118, doi:10.1128/mBio.01186-18 %j  
909 mBio (2018).
- 910 46 Thandar, S. M., Ushiki, N., Fujitani, H., Sekiguchi, Y. & Tsuneda, S.  
911 Ecophysiology and Comparative Genomics of *Nitrosomonas mobilis* Ms1  
912 Isolated from Autotrophic Nitrifying Granules of Wastewater Treatment  
913 Bioreactor. *Frontiers in Microbiology* **7**, 1869, doi:10.3389/fmicb.2016.01869  
914 (2016).
- 915 47 Fujitani, H., Kumagai, A., Ushiki, N., Momiuchi, K. & Tsuneda, S. Selective  
916 isolation of ammonia-oxidizing bacteria from autotrophic nitrifying granules  
917 by applying cell-sorting and sub-culturing of microcolonies. *Frontiers in*  
918 *Microbiology* **6**, 1-10, doi:10.3389/fmicb.2015.01159 (2015).
- 919 48 Overbeek, R., Fonstein, M., D’Souza, M., Gordon, D. P. & Maltsev, N. The use of  
920 gene clusters to infer functional coupling. *Proc Natl Acad Sci USA* **96**, 2896-  
921 2901 (1999).
- 922 49 Pellegrini, M., Marcotte, E., Thompson, M. J., Eisenberg, D. & Yeates, T. O.  
923 Assigning protein functions by comparative genome analysis: Protein  
924 phylogenetic profiles. *Proc Natl Acad Sci USA* **96**, 4285-4288 (1999).
- 925 50 Melnyk, R. a. *et al.* Identification of a perchlorate reduction genomic island  
926 with novel regulatory and metabolic genes. *Applied and environmental*  
927 *microbiology* **77**, 7401-7404, doi:10.1128/AEM.05758-11 (2011).
- 928 51 Clark, I. C., Melnyk, R. a., Engelbrektsen, A. & Coates, J. D. Structure and  
929 evolution of chlorate reduction composite transposons. *mBio* **4**, e00379-  
930 00313, doi:10.1128/mBio.00379-13 (2013).
- 931 52 Melnyk, R. A. & Coates, J. D. The Perchlorate Reduction Genomic Island:  
932 Mechanisms and Pathways of Evolution by Horizontal Gene Transfer. *BMC*  
933 *Genomics* **16**, 862, doi:10.1186/s12864-015-2011-5 (2015).
- 934 53 Nontaleerak, B. *et al.* Roles of RcsA, an AhpD Family Protein, in Reactive  
935 Chlorine Stress Resistance and Virulence in *Pseudomonas aeruginosa*.  
936 *Applied and Environmental Microbiology* **86**, e01480-01420,  
937 doi:10.1128/AEM.01480-20 (2020).

- 938 54 Kallberg, Y., Oppermann, U. & Persson, B. Classification of the short-chain  
939 dehydrogenase/reductase superfamily using hidden Markov models. *FEBS J*  
940 **277**, 2375-2386, doi:10.1111/j.1742-4658.2010.07656.x (2010).
- 941 55 Price, M. N. *et al.* Mutant phenotypes for thousands of bacterial genes of  
942 unknown function. *Nature* **557**, 503-509, doi:10.1038/s41586-018-0124-0  
943 (2018).
- 944 56 Melnyk, R. a. *et al.* Novel Mechanism for Scavenging of Hypochlorite Involving  
945 a Periplasmic Methionine-Rich Peptide and Methionine Sulfoxide Reductase.  
946 *mBio* **6**, e00233-00215, doi:10.1128/mBio.00233-15.Editor (2015).
- 947 57 Sultana, S., Foti, A. & Dahl, J.-U. Bacterial Defense Systems against the  
948 Neutrophilic Oxidant Hypochlorous Acid. *Infection and Immunity* **88**, e00964-  
949 00919, doi:10.1128/IAI.00964-19 (2020).
- 950 58 Stewart, V. Nitrate respiration in relation to facultative metabolism in  
951 enterobacteria. *Microbiol Rev* **52**, 190-232 (1988).
- 952 59 Tran, P. *et al.* Microbial life under ice: Metagenome diversity and in situ  
953 activity of Verrucomicrobia in seasonally ice-covered Lakes. *Environmental*  
954 *Microbiology* **20**, 2568-2584, doi:<https://doi.org/10.1111/1462-2920.14283>  
955 (2018).
- 956 60 Tsuji, J. M. *et al.* Anoxygenic photosynthesis and iron-sulfur metabolic  
957 potential of Chlorobia populations from seasonally anoxic Boreal Shield  
958 lakes. *The ISME Journal* **14**, 2732-2747, doi:10.1038/s41396-020-0725-0  
959 (2020).
- 960 61 Clark, I. C. *et al.* Genetic dissection of chlorate respiration in *Pseudomonas*  
961 *stutzeri* PDA reveals syntrophic (per)chlorate reduction. *Environmental*  
962 *Microbiology* **18**, 3342-3354, doi:10.1111/1462-2920.13068 (2016).
- 963 62 Chapman, A. L. P., Hampton, M. B., Senthilmohan, R., Winterbourn, C. C. &  
964 Kettle, A. J. Chlorination of Bacterial and Neutrophil Proteins during  
965 Phagocytosis and Killing of *Staphylococcus aureus*. *Journal of Biological*  
966 *Chemistry* **277**, 9757-9762, doi:<https://doi.org/10.1074/jbc.M106134200>  
967 (2002).
- 968 63 Liu, Q., Song, W.-Z., Zhou, Y.-G., Dong, X.-Z. & Xin, Y.-H. Phenotypic divergence  
969 of thermotolerance: Molecular basis and cold adaptive evolution related to  
970 intrinsic DNA flexibility of glacier-inhabiting Cryobacterium strains.  
971 *Environmental Microbiology* **22**, 1409-1420,  
972 doi:<https://doi.org/10.1111/1462-2920.14957> (2020).
- 973 64 Singh, D., Kumari, A., Ramaswamy, S. & Ramanathan, G. Expression,  
974 purification and substrate specificities of 3-nitrotoluene dioxygenase from  
975 *Diaphorobacter* sp. strain DS2. *Biochemical and Biophysical Research*  
976 *Communications* **445**, 36-42, doi:<https://doi.org/10.1016/j.bbrc.2014.01.113>  
977 (2014).
- 978 65 Barnum, T. P. & Coates, J. D. An uncharacterized clade in the DMSO reductase  
979 family of molybdenum oxidoreductases is a new type of chlorate reductase.  
980 *Environ Microbiol Rep* **12**, 534-539, doi:10.1111/1758-2229.12869 (2020).
- 981 66 Anantharaman, K. *et al.* Thousands of microbial genomes shed light on  
982 interconnected biogeochemical processes in an aquifer system. *Nature*  
983 *communications* **7**, 13219, doi:10.1038/ncomms13219 (2016).

- 984 67 Liebensteiner, M. G. *et al.* Perchlorate and chlorate reduction by the  
985 Crenarchaeon *Aeropyrum pernix* and two thermophilic Firmicutes.  
986 *Environmental Microbiology Reports* **7**, 936-945, doi:10.1111/1758-  
987 2229.12335 (2015).
- 988 68 Liebensteiner, M. G., Pinkse, M. W. H., Schaap, P. J., Stams, A. J. M. & Lomans, B.  
989 P. Archaeal (per)chlorate reduction at high temperature: an interplay of  
990 biotic and abiotic reactions. *Science (New York, N.Y.)* **340**, 85-87,  
991 doi:10.1126/science.1233957 (2013).
- 992 69 Barnum, T. P. *et al.* Genome-resolved metagenomics identifies genetic  
993 mobility, metabolic interactions, and unexpected diversity in perchlorate-  
994 reducing communities. *ISME Journal* **12**, 1568-1581, doi:10.1038/s41396-  
995 018-0081-5 (2018).
- 996 70 Brundrett, M., Yan, W., Velazquez, M. C., Rao, B. & Jackson, W. A. Abiotic  
997 Reduction of Chlorate by Fe(II) Minerals: Implications for Occurrence and  
998 Transformation of Oxy-Chlorine Species on Earth and Mars. *ACS Earth and*  
999 *Space Chemistry* **3**, 700-710, doi:10.1021/acsearthspacechem.8b00206  
1000 (2019).
- 1001 71 Gao, Q. & Garcia-Pichel, F. Microbial ultraviolet sunscreens. *Nat Rev Microbiol*  
1002 **9**, 791-802, doi:10.1038/nrmicro2649 (2011).
- 1003 72 Latifi, A., Ruiz, M. & Zhang, C. C. Oxidative stress in cyanobacteria. *FEMS*  
1004 *Microbiol Rev* **33**, 258-278, doi:10.1111/j.1574-6976.2008.00134.x (2009).
- 1005 73 Cornet, L. *et al.* Metagenomic assembly of new (sub)polar Cyanobacteria and  
1006 their associated microbiome from non-axenic cultures. *Microb Genom* **4**,  
1007 doi:10.1099/mgen.0.000212 (2018).
- 1008 74 Krohn-Molt, I. *et al.* Metagenome survey of a multispecies and alga-associated  
1009 biofilm revealed key elements of bacterial-algal interactions in  
1010 photobioreactors. *Appl Environ Microbiol* **79**, 6196-6206,  
1011 doi:10.1128/AEM.01641-13 (2013).
- 1012 75 Radi, R. Oxygen radicals, nitric oxide, and peroxyxynitrite: Redox pathways in  
1013 molecular medicine. *Proc Natl Acad Sci. USA* **115**, 5839-5848,  
1014 doi:10.1073/pnas.1804932115 (2018).
- 1015 76 Moller, M. N. *et al.* Detection and quantification of nitric oxide-derived  
1016 oxidants in biological systems. *J Biol Chem* **294**, 14776-14802,  
1017 doi:10.1074/jbc.REV119.006136 (2019).
- 1018 77 Forrester, M. T. & Foster, M. W. Protection from nitrosative stress: a central  
1019 role for microbial flavohemoglobin. *Free Radic Biol Med* **52**, 1620-1633,  
1020 doi:10.1016/j.freeradbiomed.2012.01.028 (2012).
- 1021 78 Hofbauer, S. *et al.* Transiently produced hypochlorite is responsible for the  
1022 irreversible inhibition of chlorite dismutase. *Biochemistry* **53**, 3145-3157,  
1023 doi:10.1021/bi500401k (2014).
- 1024 79 Soto-Giron, M. J. *et al.* Biofilms on Hospital Shower Hoses: Characterization  
1025 and Implications for Nosocomial Infections. *Appl Environ Microbiol* **82**, 2872-  
1026 2883, doi:10.1128/AEM.03529-15 (2016).
- 1027 80 Le Dantec, C. *et al.* Chlorine disinfection of atypical mycobacteria isolated  
1028 from a water distribution system. *Appl Environ Microbiol* **68**, 1025-1032,  
1029 doi:10.1128/aem.68.3.1025-1032.2002 (2002).

- 1030 81 Hwang, C., Ling, F., Andersen, G. L., LeChevallier, M. W. & Liu, W. T. Microbial  
1031 community dynamics of an urban drinking water distribution system  
1032 subjected to phases of chloramination and chlorination treatments. *Appl*  
1033 *Environ Microbiol* **78**, 7856-7865, doi:10.1128/AEM.01892-12 (2012).
- 1034 82 El-Gebali, S. *et al.* The Pfam protein families database in 2019. *Nucleic Acids*  
1035 *Research* **47**, D427-D432, doi:10.1093/nar/gky995 %J Nucleic Acids  
1036 Research (2018).
- 1037 83 Chen, C. *et al.* Representative Proteomes: A Stable, Scalable and Unbiased  
1038 Proteome Set for Sequence Analysis and Functional Annotation. *PLOS ONE* **6**,  
1039 e18910, doi:10.1371/journal.pone.0018910 (2011).
- 1040 84 Price, M. N., Dehal, P. S. & Arkin, A. P. J. P. o. FastTree 2—approximately  
1041 maximum-likelihood trees for large alignments. **5**, e9490 (2010).
- 1042 85 Finn, R. D. *et al.* HMMER web server: 2015 update. *Nucleic Acids Research*, 1-  
1043 9, doi:10.1093/nar/gkv397 (2015).
- 1044 86 Mendler, K. *et al.* AnnoTree: visualization and exploration of a functionally  
1045 annotated microbial tree of life. *Nucleic Acids Research* **47**, 4442-4448,  
1046 doi:10.1093/nar/gkz246 %J Nucleic Acids Research (2019).
- 1047 87 Camacho, C. *et al.* BLAST plus: architecture and applications. *BMC*  
1048 *Bioinformatics* **10**, 421, doi:Artn 421\nDoi 10.1186/1471-2105-10-421  
1049 (2009).
- 1050 88 Chen, I.-M. A. *et al.* IMG/M: integrated genome and metagenome comparative  
1051 data analysis system. *Nucleic acids research* **45**, 507-516,  
1052 doi:10.1093/nar/gkw929 (2017).
- 1053 89 Coordinators, N. R., Om-, G. E., Viewer, M. & Read, S. Database resources of  
1054 the National Center for Biotechnology Information. *Nucleic acids research* **43**,  
1055 6-17, doi:10.1093/nar/gku1130 (2014).
- 1056 90 Parks, D. H. *et al.* Recovery of nearly 8,000 metagenome-assembled genomes  
1057 substantially expands the tree of life. *Nature Microbiology* **2**, 1533-1542,  
1058 doi:10.1038/s41564-017-0012-7 (2017).
- 1059 91 Edgar, R. C. MUSCLE: multiple sequence alignment with high accuracy and  
1060 high throughput. *Nucleic acids research* **32**, 1792-1797,  
1061 doi:10.1093/nar/gkh340 (2004).
- 1062 92 Huerta-Cepas, J., Serra, F. & Bork, P. ETE 3: Reconstruction, Analysis, and  
1063 Visualization of Phylogenomic Data. *Molecular Biology and Evolution* **33**,  
1064 1635-1638, doi:10.1093/molbev/msw046 %J Molecular Biology and  
1065 Evolution (2016).
- 1066 93 Almagro Armenteros, J. J. *et al.* SignalP 5.0 improves signal peptide  
1067 predictions using deep neural networks. *Nature Biotechnology* **37**, 420-423,  
1068 doi:10.1038/s41587-019-0036-z (2019).
- 1069 94 Hauser, M., Steinegger, M. & Söding, J. J. B. MMseqs software suite for fast and  
1070 deep clustering and searching of large protein sequence sets. **32**, 1323-1330  
1071 (2016).  
1072



## A. Pfam 06778 (Representative Proteomes 75)

### Residues for Cld Activity

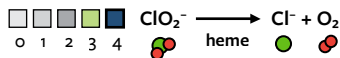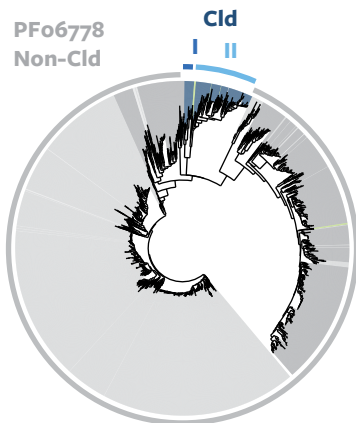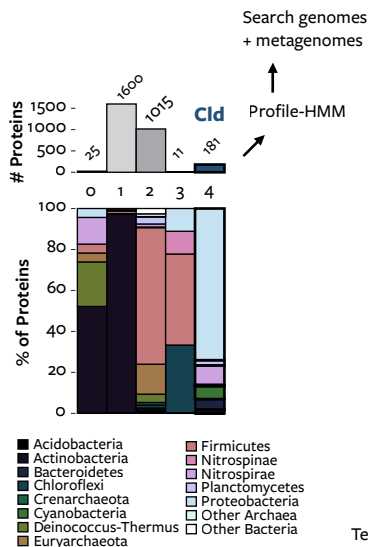

## B. Distribution across bacterial tree of life (AnnoTree)

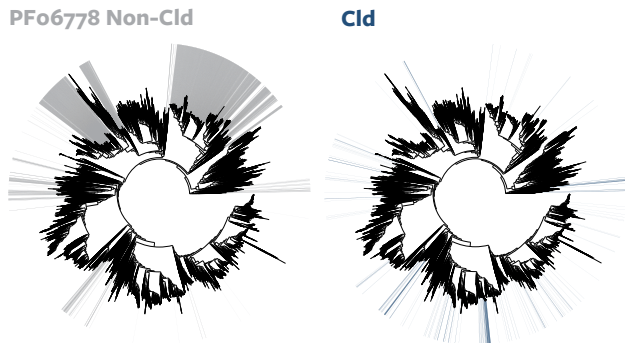

## C. # Cld Detected (thousands)

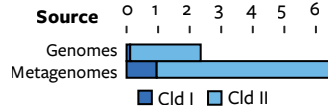

## D. # Cld (NCBI) % of Phylum

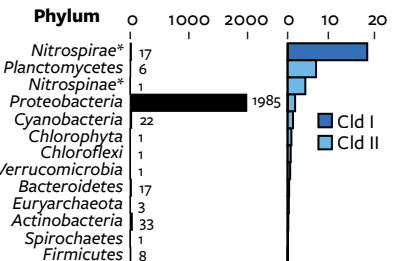

## F. # Cld Detected Cld per 10<sup>6</sup> CDS

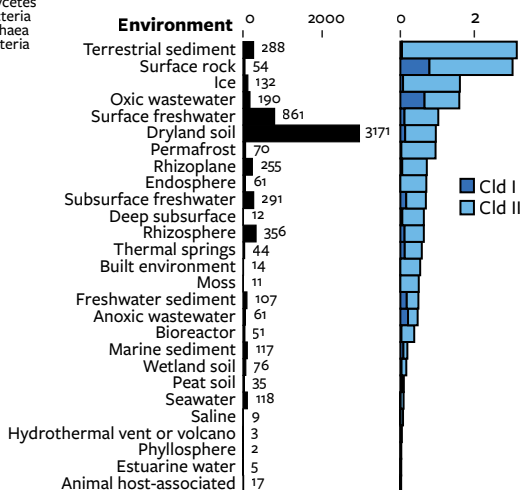

## E. # Cld (NCBI) % of Genus

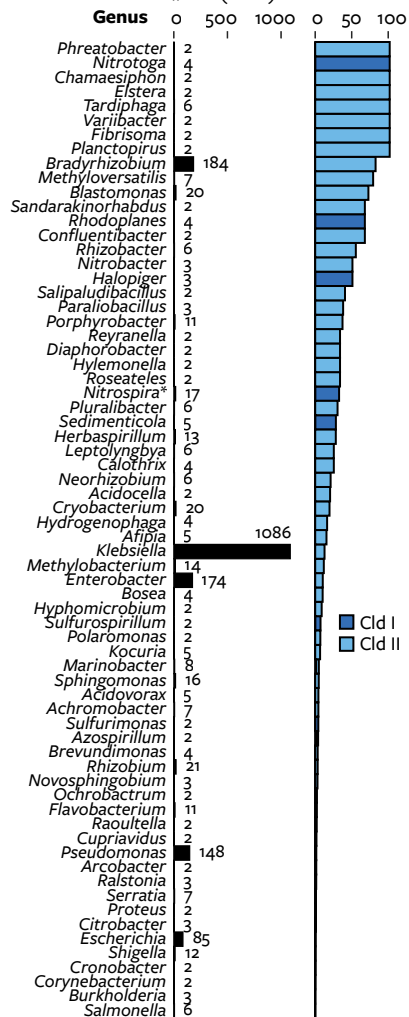

## A. Cld Phylogeny

Clade contains:

- ✓ Cld biochemically verified
- ρ Cld used as search query

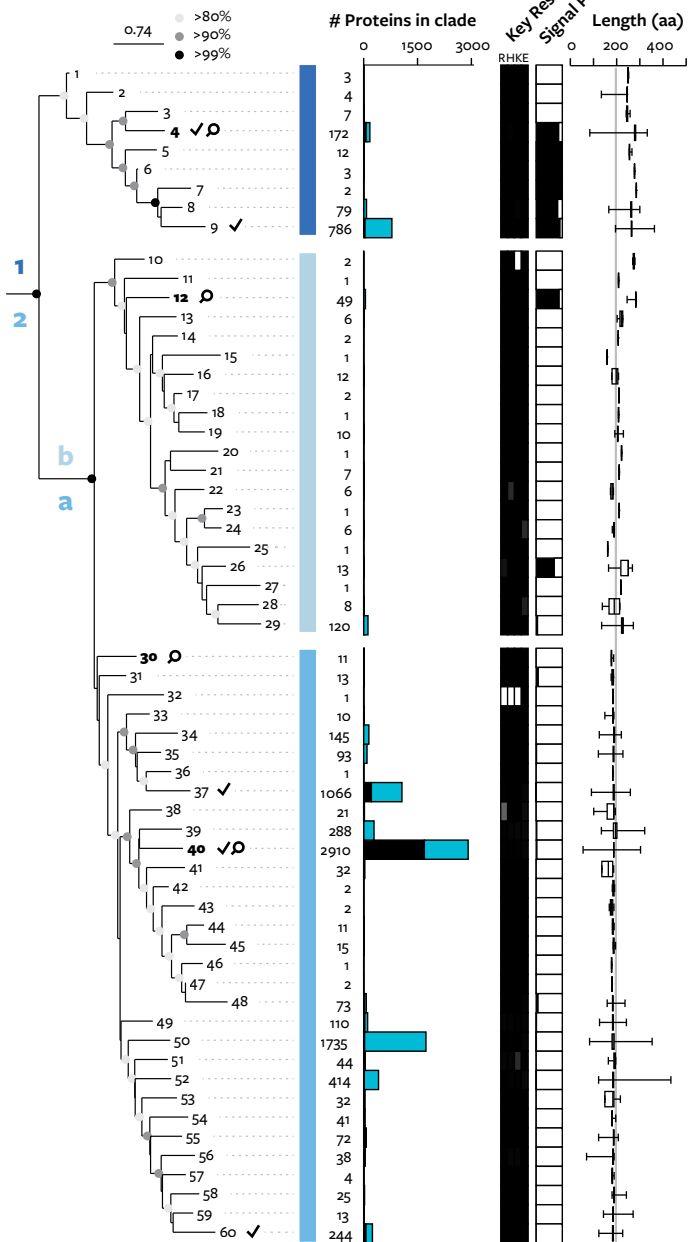

## B. 1° Structure

## C. Distribution

## D. Recent HGT

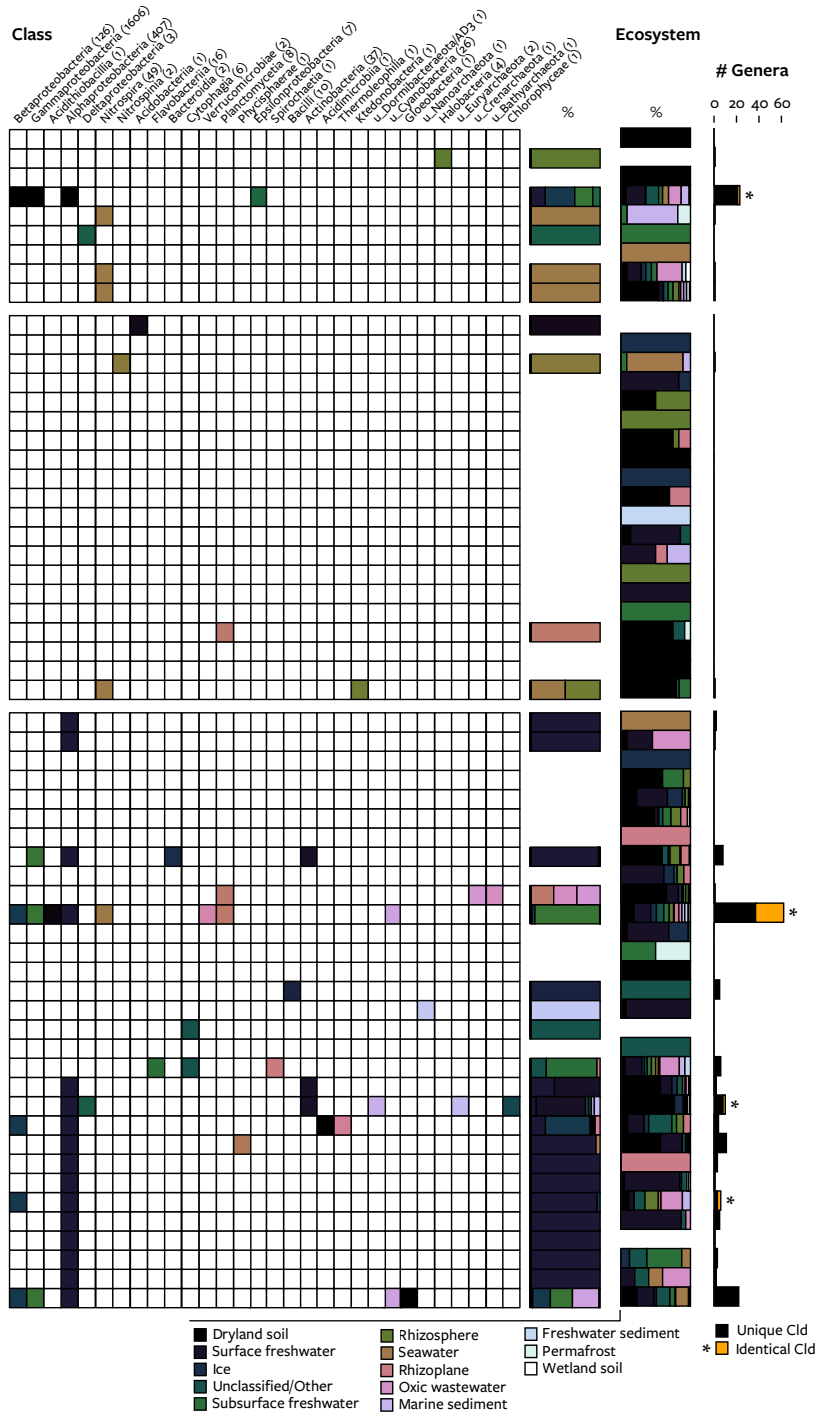

## A. Methods

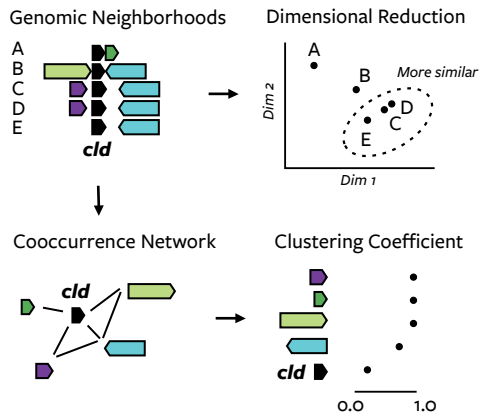

## B. Protein subfamilies associated with Cld genomic neighborhoods

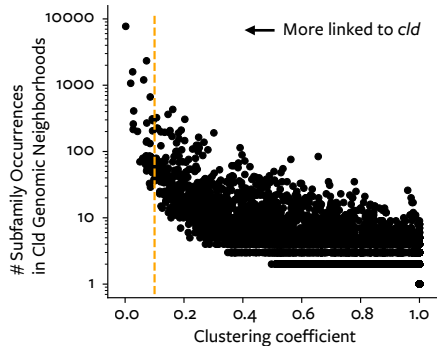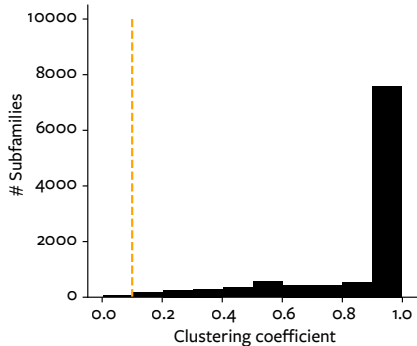

## C. Cld gene neighborhoods grouped by similar protein subfamily content

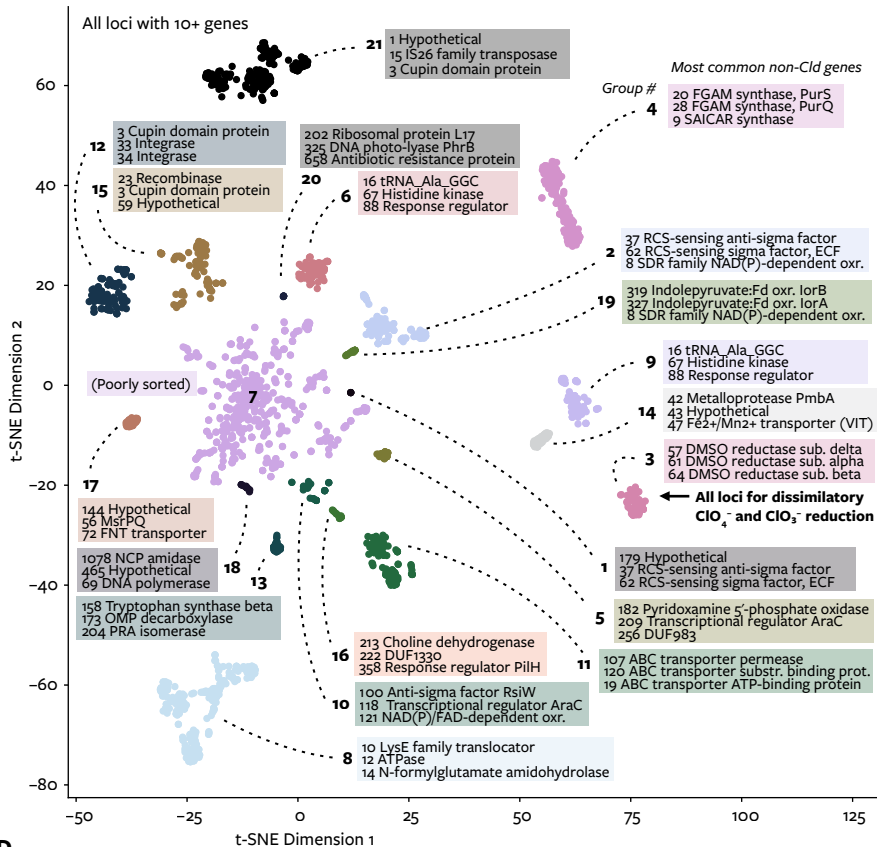

## D.

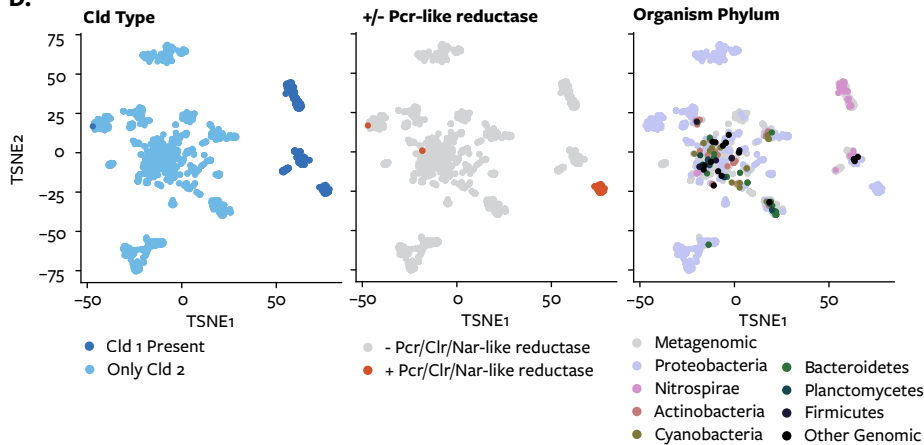

## A. Perchlorate and chlorate reductases

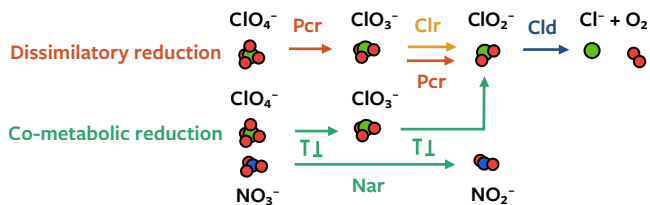

## B. DMSO reductase family (PF00384)

■ Present in Cld genomic neighborhood

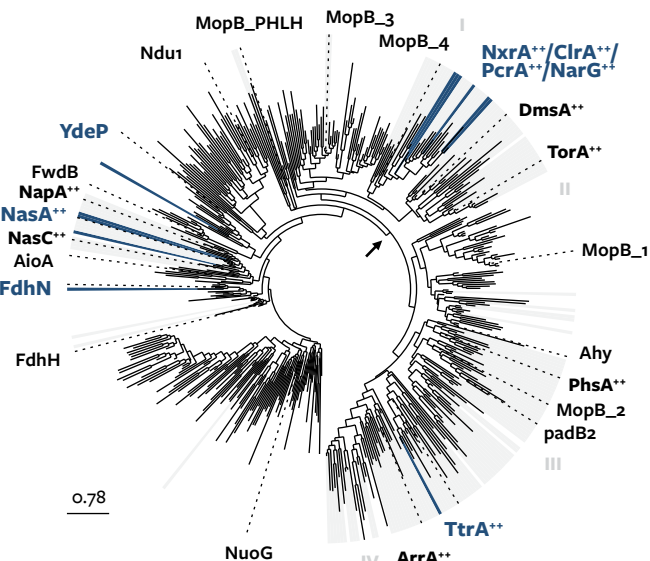

## D. Specific sources of Pcr + Clr

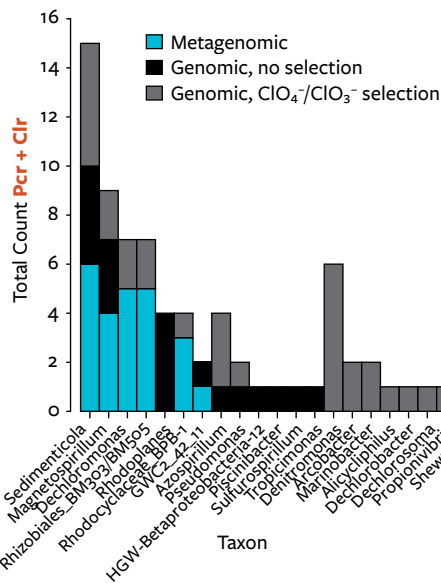

## E. Sources of all reductases

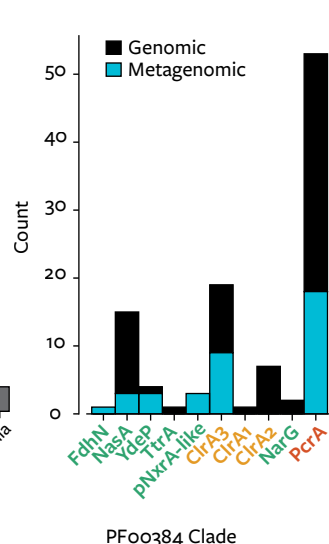

## C. Phylogeny of Cld-associated oxidoreductases

■ Metagenomic ■ Genomic,  $\text{ClO}_4^-/\text{ClO}_3^-$  selection  
 ■ Genomic, no selection

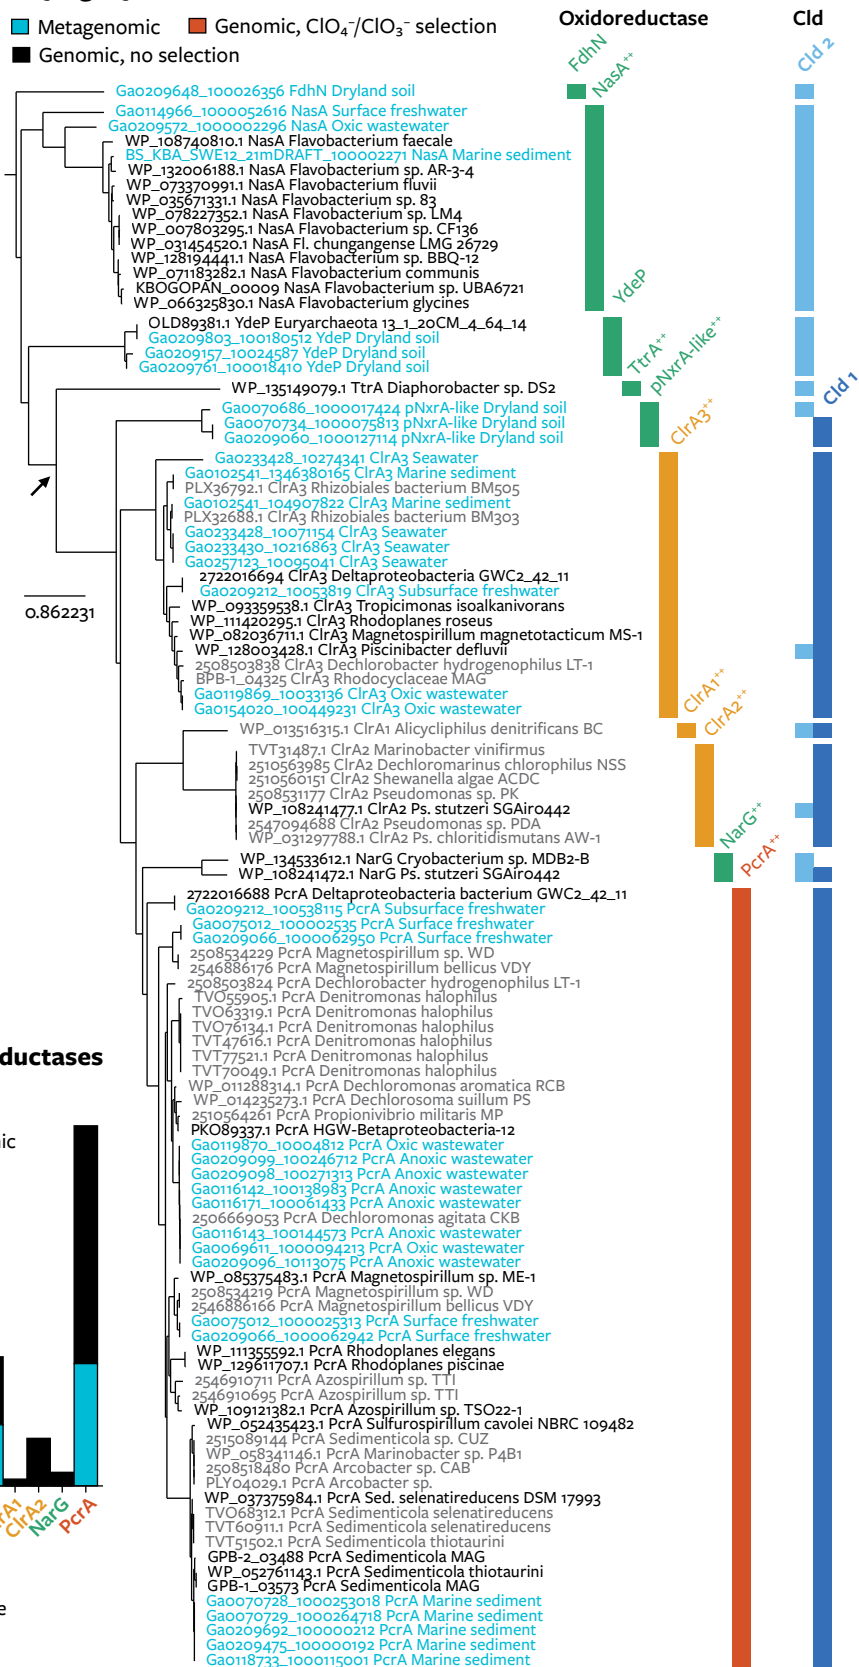

## A. Genomes without (per)chlorate reductase activity (PCRA)

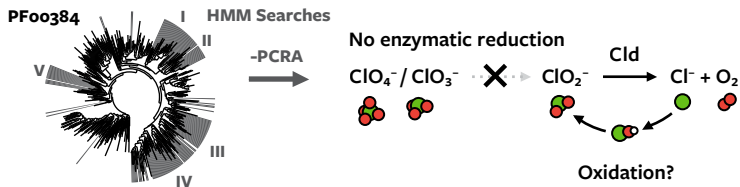

## B. Isolate genomes +Cld -PCRA

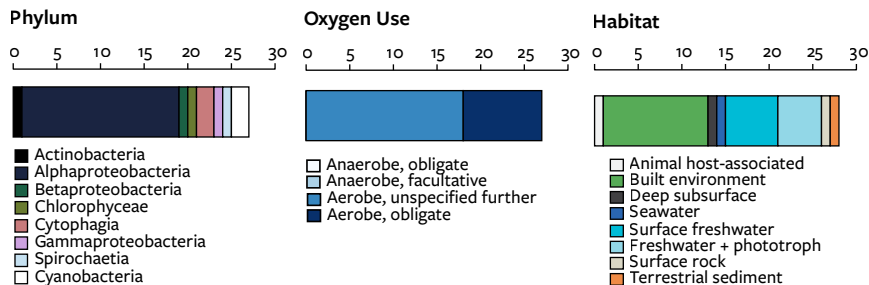

## C. Potential oxidative sources of $\text{ClO}_2^-$

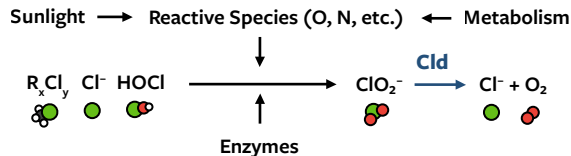

## D. A habitat enriched for +Cld -PCRA genomes

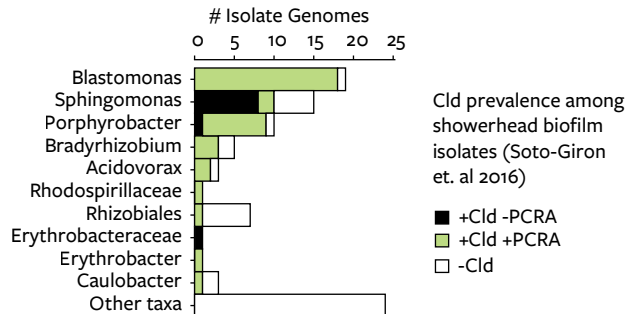

# Chlorine Reduction and Oxidation in Biology

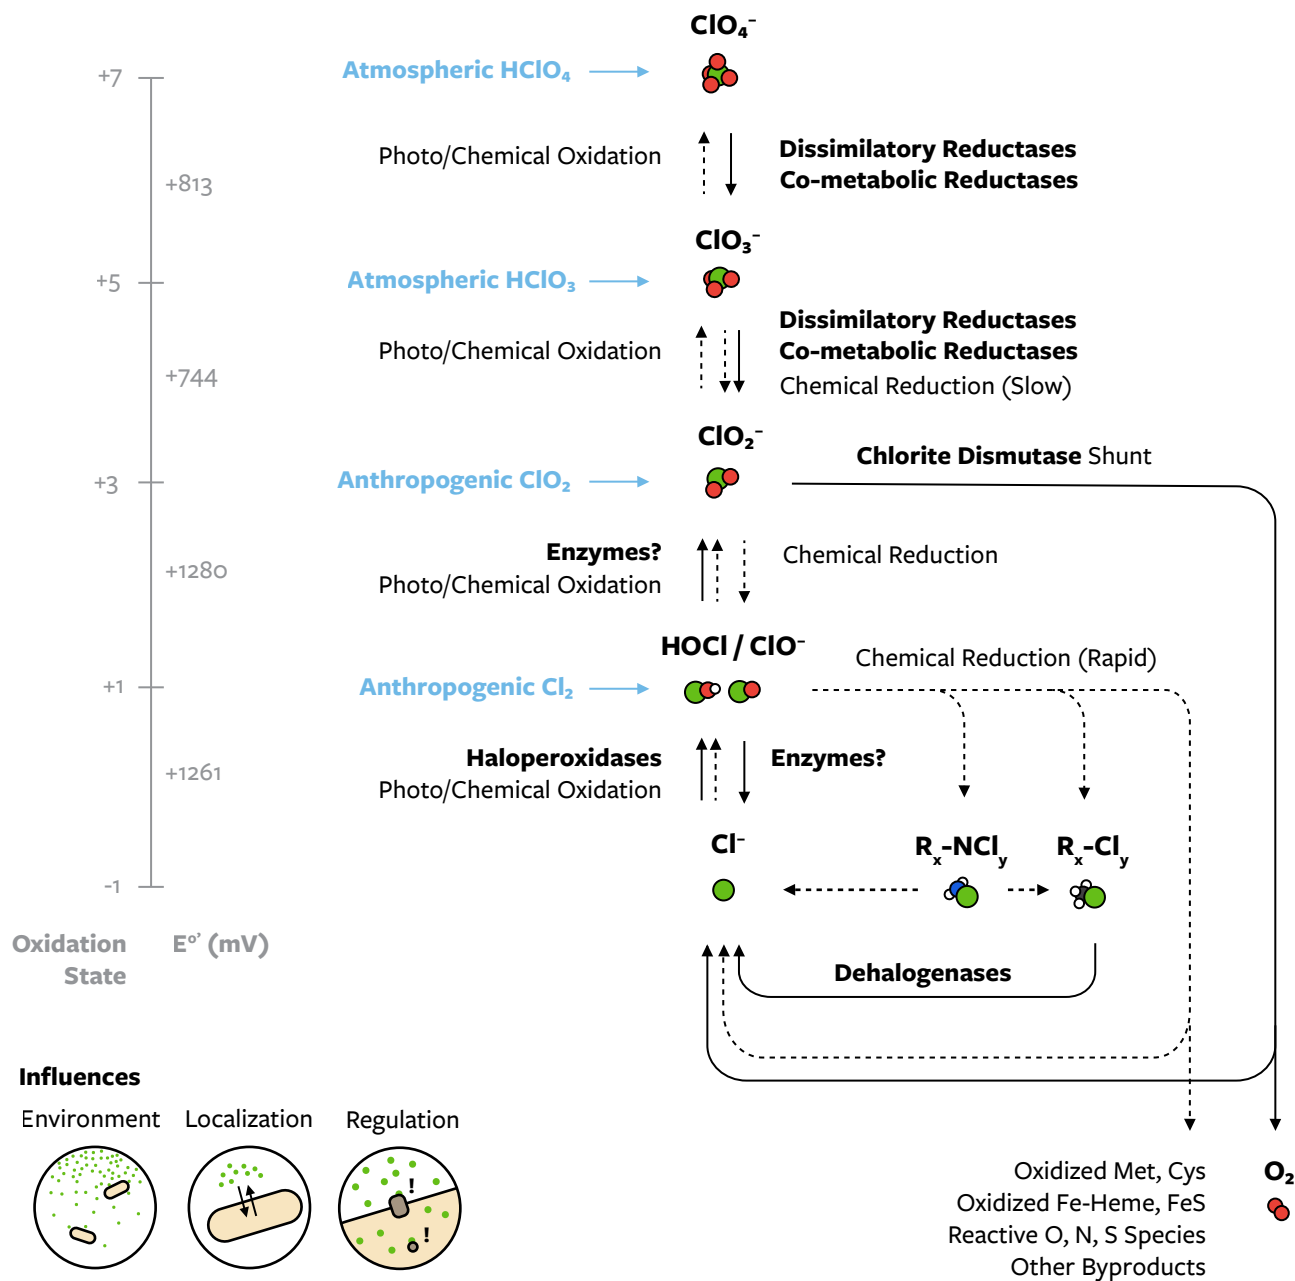

Source: https://www.biorxiv.org/content/10.1101/2021.12.08.471835v1.full.pdf
